# Supplementary material
Source: publisher figshare collection journal article supplement (https://plos.figshare.com/articles/dataset/_/6196019)
Supplement: Supplementary file 1 [file 1 › S2 Table.pdf]

**S2 Table. Antibodies used in the study**

| <b>Antibody</b>                                 | <b>Supplier</b> | <b>Antibody Registry number</b> | <b>Dilution</b> |
|-------------------------------------------------|-----------------|---------------------------------|-----------------|
| Polyclonal goat anti HSP60                      | Abcam (Ab82520) | AB_1658326                      | 1:500           |
| Monoclonal mouse anti HSP70                     | Abcam (Ab2787)  | AB_303300                       | 1:1000          |
| Polyclonal rabbit anti HSP90                    | Abcam (Ab13495) | AB_1269122                      | 1:1000          |
| Monoclonal rat anti Grp94                       | Abcam (Ab90458) | AB_2295611                      | 1:1000          |
| Polyclonal rabbit anti $\beta$ -actin           | Abcam (Ab8227)  | AB_2305186                      | 1:1000          |
| Polyclonal goat anti-mouse Immunoglobulins HRP  | DAKO (P0447)    | AB_2617137                      | 1:4000          |
| Polyclonal rabbit anti-goat Immunoglobulins HRP | DAKO (P0449)    | AB_26177143                     | 1:4000          |
| Polyclonal rabbit anti-rat Immunoglobulin HRP   | DAKO (P0450)    | AB_2630354                      | 1:4000          |
| Polyclonal goat anti-rabbit Immunoglobulin HRP  | DAKO (P0448)    | AB_2617138                      | 1:4000          |
