# Supplementary material
Source: publisher figshare collection journal article supplement (https://plos.figshare.com/articles/dataset/_/6196019)
Supplement: Supplementary file 1 [file 1 › S3 Table.pdf]

**S3 Table. HSPs identified in the proteome of a DFTD cell line (1)**

| Gene symbol*                                                      | Name*                                               | Number of unique peptides |
|-------------------------------------------------------------------|-----------------------------------------------------|---------------------------|
| <b>HSP70 superfamily: HSPA (HSP70) and HSPH (HSP110) families</b> |                                                     |                           |
| HSPA Family                                                       |                                                     |                           |
| HSPA2                                                             | Heat shock protein family A (Hsp70) member 2        | 17                        |
| HSPA4                                                             | Heat shock protein family A (Hsp70) member 4        | 20                        |
| HSPA5                                                             | Heat shock protein family A (Hsp70) member 5        | 33                        |
| HSPA8                                                             | Heat shock protein family A (Hsp70) member 8        | 37                        |
| HSPA9                                                             | Heat shock protein family A (Hsp70) member 9        | 28                        |
| HSPH Family                                                       |                                                     |                           |
| HSPH1                                                             | Heat shock protein family H (Hsp110) member 1       | 28                        |
| <b>HSP90 family</b>                                               |                                                     |                           |
| HSP90AA1                                                          | Heat shock protein 90 alpha family class A member 1 | 24                        |
| HSP90AB1                                                          | Heat shock protein 90 alpha family class B member 1 | 40                        |
| HSP90B1                                                           | Heat shock protein 90 beta family member 1          | 44                        |
| <b>Chaperonins family</b>                                         |                                                     |                           |
| HSPD1                                                             | Heat shock protein family D (Hsp60) member 1        | 35                        |
| HSPE1                                                             | Heat shock protein family E (Hsp10) member 1        | 5                         |
| CCT2                                                              | Chaperonin containing TCP1 subunit 2                | 29                        |
| CCT3                                                              | Chaperonin containing TCP1 subunit 3                | 21                        |
| CCT4                                                              | Chaperonin containing TCP1 subunit 4                | 20                        |
| CCT5                                                              | Chaperonin containing TCP1 subunit 5                | 19                        |
| CCT6B                                                             | CCT6B                                               | 9                         |
| CCT7                                                              | Chaperonin containing TCP1 subunit 7                | 15                        |
| CCT8                                                              | Chaperonin containing TCP1 subunit 8                | 25                        |
| <b>DNAJ (HSP40) family</b>                                        |                                                     |                           |
| DNAJA1                                                            | DnaJ heat shock protein family (Hsp40) member A1    | 4                         |
| DNAJA2                                                            | DnaJ heat shock protein family (Hsp40) member A2    | 9                         |
| DNAJA3                                                            | DnaJ heat shock protein family (Hsp40) member A3    | 2                         |
| DNAJB11                                                           | DnaJ heat shock protein family (Hsp40) member B11   | 5                         |
| DNAJC8                                                            | DnaJ heat shock protein family (Hsp40) member C8    | 2                         |

\*Nomenclature according to the HUGO Gene Nomenclature Committee (HGNC).

1. Patchett AL, Wilson R, Charlesworth JC, Corcoran LM, Papenfuss AT, Lyons AB, et al. Transcriptome and proteome profiling reveals stress-induced expression signatures of imiquimod-treated Tasmanian devil facial tumor disease (DFTD) cells. *Oncotarget*. 2018;9:15895-914.
