# Supplementary material
Source: publisher figshare collection journal article supplement (https://plos.figshare.com/articles/dataset/_/6196019)
Supplement: Supplementary file 1 [file 1 › S4 Table.xlsx]

## Sheet: Peptides
Sequence	N-term cleavage window	C-term cleavage window	Amino acid before	First amino acid	Second amino acid	Second last amino acid	Last amino acid	Amino acid after	A Count	R Count	N Count	D Count	C Count	Q Count	E Count	G Count	H Count	I Count	L Count	K Count	M Count	F Count	P Count	S Count	T Count	W Count	Y Count	V Count	U Count	Length	Missed cleavages	Mass	Proteins	Leading razor protein	Start position	End position	Unique (Groups)	Unique (Proteins)	Charges	PEP	Score	Pep_ 7750	Pep_ 7751	Pep_ 7752	Pep_ 7753	Pep_ 7754	Pep_ 7755	Pep_ 7756	Pep_ 7757
DADVPLKPEEFEVTSTAVIHR	YSKASTGKDADVPLKP	TSTAVIHRQGAFRSEL	K	D	A	H	R	Q	2	1	0	2	0	0	3	0	1	1	1	1	0	1	2	1	2	0	0	3	0	21	1	2352.2	G3VBS9	G3VBS9	53	73	yes	yes	3	0.00016267	79.676						1
ISHQMQTLQDLKLELR	EEKARQDRISHQMQTL	QDLKLELREAVLQPNL	R	I	S	L	R	E	0	1	0	1	0	3	1	0	1	1	4	1	1	0	0	1	1	0	0	0	0	16	1	1952.05	G3VCC3	G3VCC3	212	227	yes	yes	2	0.024452	60.631			1
FSMVVQDGVVK	FGNHRLKRFSMVVQDG	VVQDGVVKALNVEPDG	R	F	S	V	K	A	0	0	0	1	0	1	0	1	0	0	0	1	1	1	0	1	0	0	0	4	0	11	0	1207.63	G3VCM9	G3VCM9	154	164	yes	yes	2	0.00058185	129.74
LLADPTGAFGK	QKAAGKVRLLADPTGA	DPTGAFGKAAELLLDD	R	L	L	G	K	A	2	0	0	1	0	0	0	2	0	0	2	1	0	1	1	0	1	0	0	0	0	11	0	1088.59	G3VCM9	G3VCM9	122	132	yes	yes	2	0.0027198	100.82
VGDALPSVEVFEGDPGNK	GGTITSGKVGDALPSV	FEGDPGNKVNLAELFK	K	V	G	N	K	V	1	0	1	2	0	0	2	3	0	0	1	1	0	1	2	1	0	0	0	3	0	18	0	1828.88	G3VCM9	G3VCM9	31	48	yes	yes	2	0.0099851	69.485
DNLTLWTSDQQDDDGGEGNN	TLIMQLLRDNLTLWTS	DDGGEGNN________	R	D	N	N	N	-	0	0	3	5	0	2	1	3	0	0	2	0	0	0	0	1	2	1	0	0	0	20	0	2192.87	G3VE53	G3VE53	207	226	yes	yes	2	5.6043e-22	179.78
TAFDDAIAELDTLNEDSYK	EQACLLAKTAFDDAIA	TLNEDSYKDSTLIMQL	K	T	A	Y	K	D	3	0	1	4	0	0	2	0	0	1	2	1	0	1	0	1	2	0	1	0	0	19	0	2129.96	G3VE53	G3VE53	178	196	yes	yes	2;3	2.0453e-48	218.64
DFLLQQTMLR	SDPDPSTKDFLLQQTM	LLQQTMLRIKDPKRSL	K	D	F	L	R	I	0	1	0	1	0	2	0	0	0	0	3	0	1	1	0	0	1	0	0	0	0	10	0	1263.66	G3VF62	G3VF62	32	41	yes	yes	2	0.037002	67.214
EPSHDSSWPK	TAVSVKRKEPSHDSSW	SHDSSWPKEKKKPALD	K	E	P	P	K	E	0	0	0	1	0	0	1	0	1	0	0	1	0	0	2	3	0	1	0	0	0	10	0	1168.51	G3VFN9	G3VFN9	171	180	yes	yes	2	0.003122	100.25
ATFSGVQSFQDLSSTVLAQSK	QTQIEELRATFSGVQS	STVLAQSKERASKARE	R	A	T	S	K	E	2	0	0	1	0	3	0	1	0	0	2	1	0	2	0	5	2	0	0	2	0	21	0	2200.1	G3VGI4;G3VGI5	G3VGI4	383	403	yes	no	2;3	0.00070539	76.015
DAVSSTVLGAK	SSTVWGAKDAVSSTVL	SSTVLGAKDAVATRVT	K	D	A	A	K	D	2	0	0	1	0	0	0	1	0	0	1	1	0	0	0	2	1	0	0	2	0	11	0	1046.56	G3VGI4	G3VGI4	143	153	yes	yes	2	0.0032475	97.452
EQQGYFVR	MASVQQQKEQQGYFVR	EQQGYFVRLGSLSSKL	K	E	Q	V	R	L	0	1	0	0	0	2	1	1	0	0	0	0	0	1	0	0	0	0	1	1	0	8	0	1025.49	G3VGI4;G3VGI5	G3VGI4	244	251	yes	no	2	0.029387	69.198
GAVQSGVDMTK	TEAVDMTRGAVQSGVD	QSGVDMTKSMVTSSVN	R	G	A	T	K	S	1	0	0	1	0	1	0	2	0	0	0	1	1	0	0	1	1	0	0	2	0	11	0	1091.53	G3VGI4;G3VGI5	G3VGI4	169	179	yes	no	2	0.0014895	110.64
IATSLEGFDMASVQQQK	MTDEELAKIATSLEGF	MASVQQQKEQQGYFVR	K	I	A	Q	K	E	2	0	0	1	0	3	1	1	0	1	1	1	1	1	0	2	1	0	0	1	0	17	0	1851.9	G3VGI4;G3VGI5	G3VGI4	227	243	yes	no	2	5.2987e-08	150.37
LEPQIASASEYAHK	GAQPLLSKLEPQIASA	SASEYAHKGLDRLEEK	K	L	E	H	K	G	3	0	0	0	0	1	2	0	1	1	1	1	0	0	1	2	0	0	1	0	0	14	0	1542.77	G3VGI4;G3VGI5	G3VGI4	83	96	yes	no	2	0.03153	66.738
LPILQQPSDK	GLDRLEEKLPILQQPS	ILQQPSDKVLADTKEL	K	L	P	D	K	V	0	0	0	1	0	2	0	0	0	1	2	1	0	0	2	1	0	0	0	0	0	10	0	1137.64	G3VGI4;G3VGI5	G3VGI4	105	114	yes	no	2	0.0012203	125.74
SLAAAAASGAQPLLSK	GLAEQGAKSLAAAAAS	GAQPLLSKLEPQIASA	K	S	L	S	K	L	6	0	0	0	0	1	0	1	0	0	3	1	0	0	1	3	0	0	0	0	0	16	0	1454.81	G3VGI4;G3VGI5	G3VGI4	67	82	yes	no	2	1.5896e-25	189.04
SMVTSSVNTVMGSK	QSGVDMTKSMVTSSVN	VNTVMGSKVGQMVLSG	K	S	M	S	K	V	0	0	1	0	0	0	0	1	0	0	0	1	2	0	0	4	2	0	0	3	0	14	0	1426.68	G3VGI4;G3VGI5	G3VGI4	180	193	yes	no	2	0.0019174	114.21
VGQMVLSGMDTVLGK	VNTVMGSKVGQMVLSG	GMDTVLGKSEEWVDNY	K	V	G	G	K	S	0	0	0	1	0	1	0	3	0	0	2	1	2	0	0	1	1	0	0	3	0	15	0	1533.79	G3VGI4;G3VGI5	G3VGI4	194	208	yes	no	2	0.0019404	108.06
VQQAQTQIEELR	LPSNIQDKVQQAQTQI	QTQIEELRATFSGVQS	K	V	Q	L	R	A	1	1	0	0	0	4	2	0	0	1	1	0	0	0	0	0	1	0	0	1	0	12	0	1441.75	G3VGI4;G3VGI5	G3VGI4	371	382	yes	no	2	0.0032733	104.41
AHGGYSVFAGVGER	ELINNVAKAHGGYSVF	VFAGVGERTREGNDLY	K	A	H	E	R	T	2	1	0	0	0	0	1	4	1	0	0	0	0	1	0	1	0	0	1	2	0	14	0	1405.67	G3VIJ8	G3VIJ8	226	239	yes	yes	2	0.00033963	127.3							1
AIAELGIYPAVDPLDSTSR	DATTVLSRAIAELGIY	DPLDSTSRIMDPNIVG	R	A	I	S	R	I	3	1	0	2	0	0	1	1	0	2	2	0	0	0	2	2	1	0	1	1	0	19	0	1987.03	G3VIJ8	G3VIJ8	388	406	yes	yes	2;3	4.5036e-14	170			1				2
DQEGQDVLLFIDNIFR	LTVAEYFRDQEGQDVL	LFIDNIFRFTQAGSEV	R	D	Q	F	R	F	0	1	1	3	0	2	1	1	0	2	2	0	0	2	0	0	0	0	0	1	0	16	0	1920.96	G3VIJ8	G3VIJ8	295	310	yes	yes	2;3	1.5126e-120	300.56							2
EGNDLYHEMIESGVINLK	AGVGERTREGNDLYHE	ESGVINLKDTTSKVAL	R	E	G	L	K	D	0	0	2	1	0	0	3	2	1	2	2	1	1	0	0	1	0	0	1	1	0	18	0	2059.99	G3VIJ8	G3VIJ8	242	259	yes	yes	2;3	5.2522e-08	145.69							5
FTQAGSEVSALLGR	LFIDNIFRFTQAGSEV	EVSALLGRIPSAVGYQ	R	F	T	G	R	I	2	1	0	0	0	1	1	2	0	0	2	0	0	1	0	2	1	0	0	1	0	14	0	1434.75	G3VIJ8	G3VIJ8	311	324	yes	yes	2;3	2.8185e-71	247.11			1				2
IGLFGGAGVGK	APYAKGGKIGLFGGAG	FGGAGVGKTVLIMELI	K	I	G	G	K	T	1	0	0	0	0	0	0	5	0	1	1	1	0	1	0	0	0	0	0	1	0	11	0	974.555	G3VIJ8	G3VIJ8	202	212	yes	yes	2	0.00086472	117.31							3
IMDPNIVGNEHYDVAR	DPLDSTSRIMDPNIVG	NEHYDVARGVQKILQD	R	I	M	A	R	G	1	1	2	2	0	0	1	1	1	2	0	0	1	0	1	0	0	0	1	2	0	16	0	1841.87	G3VIJ8	G3VIJ8	407	422	yes	yes	2;3	0.00054481	116.87							6
IMNVIGEPIDER	VGPETLGRIMNVIGEP	IGEPIDERGPIKTKQF	R	I	M	E	R	G	0	1	1	1	0	0	2	1	0	3	0	0	1	0	1	0	0	0	0	1	0	12	0	1384.7	G3VIJ8	G3VIJ8	144	155	yes	yes	2	0.00044003	126.1							1
IPSAVGYQPTLATDMGTMQER	EVSALLGRIPSAVGYQ	DMGTMQERITTTKKGS	R	I	P	E	R	I	2	1	0	1	0	2	1	2	0	1	1	0	2	0	2	1	3	0	1	1	0	21	0	2265.08	G3VIJ8	G3VIJ8	325	345	yes	yes	2;3	1.6496e-08	132.52							6
LVLEVAQHLGESTVR	EVQDRDTRLVLEVAQH	HLGESTVRTIAMDGTE	R	L	V	V	R	T	1	1	0	0	0	1	2	1	1	0	3	0	0	0	0	1	1	0	0	3	0	15	0	1649.91	G3VIJ8	G3VIJ8	95	109	yes	yes	2;3	2.71e-25	196.18							2
QFAAIHAEAPEFVEMSVEQEILVTGIK	ERGPIKTKQFAAIHAE	EILVTGIKVVDLLAPY	K	Q	F	I	K	V	4	0	0	0	0	2	5	1	1	3	1	1	1	2	1	1	1	0	0	3	0	27	0	2985.52	G3VIJ8	G3VIJ8	162	188	yes	yes	3;4	3.2647e-11	124.19
SLQDIIAILGMDELSEEDK	QKILQDYKSLQDIIAI	DELSEEDKLTVSRARK	K	S	L	D	K	L	1	0	0	3	0	1	3	1	0	3	3	1	1	0	0	2	0	0	0	0	0	19	0	2118.04	G3VIJ8	G3VIJ8	433	451	yes	yes	2	0.0031176	75.215
SLQDIIAILGMDELSEEDKLTVSR	QKILQDYKSLQDIIAI	EDKLTVSRARKIQRFL	K	S	L	S	R	A	1	1	0	3	0	1	3	1	0	3	4	1	1	0	0	3	1	0	0	1	0	24	1	2674.37	G3VIJ8	G3VIJ8	433	456	yes	yes	2;3	6.1557e-15	148.01							2
TIAMDGTEGLVR	HLGESTVRTIAMDGTE	DGTEGLVRGQKVLDSG	R	T	I	V	R	G	1	1	0	1	0	0	1	2	0	1	1	0	1	0	0	0	2	0	0	1	0	12	0	1261.63	G3VIJ8	G3VIJ8	110	121	yes	yes	2	1.212e-09	159.44							2
TREGNDLYHEMIESGVINLK	VFAGVGERTREGNDLY	ESGVINLKDTTSKVAL	R	T	R	L	K	D	0	1	2	1	0	0	3	2	1	2	2	1	1	0	0	1	1	0	1	1	0	20	1	2317.14	G3VIJ8	G3VIJ8	240	259	yes	yes	3	0.0012844	70.615							2
TVLIMELINNVAK	FGGAGVGKTVLIMELI	ELINNVAKAHGGYSVF	K	T	V	A	K	A	1	0	2	0	0	0	1	0	0	2	2	1	1	0	0	0	1	0	0	2	0	13	0	1456.83	G3VIJ8	G3VIJ8	213	225	yes	yes	2	1.1213e-67	253.42							2
VALTGLTVAEYFR	EPPGARARVALTGLTV	LTVAEYFRDQEGQDVL	R	V	A	F	R	D	2	1	0	0	0	0	1	1	0	0	2	0	0	1	0	0	2	0	1	2	0	13	0	1438.78	G3VIJ8	G3VIJ8	282	294	yes	yes	2	1.7814e-15	177.42							1
VALVYGQMNEPPGAR	NLKDTTSKVALVYGQM	MNEPPGARARVALTGL	K	V	A	A	R	A	2	1	1	0	0	1	1	2	0	0	1	0	1	0	2	0	0	0	1	2	0	15	0	1600.8	G3VIJ8	G3VIJ8	265	279	yes	yes	2;3	1.7487e-37	214.48							10
VLDSGAPIKIPVGPETLGR	EGLVRGQKVLDSGAPI	VGPETLGRIMNVIGEP	K	V	L	G	R	I	1	1	0	1	0	0	1	3	0	2	2	1	0	0	3	1	1	0	0	2	0	19	1	1918.09	G3VIJ8	G3VIJ8	125	143	yes	yes	2;3	3.4347e-09	150.01							2
VVDLLAPYAK	EILVTGIKVVDLLAPY	DLLAPYAKGGKIGLFG	K	V	V	A	K	G	2	0	0	1	0	0	0	0	0	0	2	1	0	0	1	0	0	0	1	2	0	10	0	1087.63	G3VIJ8	G3VIJ8	189	198	yes	yes	2	0.0012248	112.3							1
LGKFIIGTMEEAGFCGIGVK	________________	GFCGIGVKSDMLSNAQ	K	L	G	V	K	S	1	0	0	0	1	0	2	5	0	3	1	2	1	2	0	0	1	0	0	1	0	20	1	2126.09	G3VIW3;G3VIW2	G3VIW3	6	25	yes	no	3	0.023538	50.831	1
VDVTEQPGLSGR	DLGVNIAKVDVTEQPG	EQPGLSGRFIITALPT	K	V	D	G	R	F	0	1	0	1	0	1	1	2	0	0	1	0	0	0	1	1	1	0	0	2	0	12	0	1256.64	G3VNJ4	G3VNJ4	82	93	yes	yes	2	0.018541	70.089
WGEDLGVNIAK	PEWEDFAKWGEDLGVN	DLGVNIAKVDVTEQPG	K	W	G	A	K	V	1	0	1	1	0	0	1	2	0	1	1	1	0	0	0	0	0	1	0	1	0	11	0	1200.61	G3VNJ4	G3VNJ4	71	81	yes	yes	2	0.040316	59.418
GDGPVQGTVFFEQK	LKAVCVLKGDGPVQGT	GTVFFEQKQVGEPVEL	K	G	D	Q	K	Q	0	0	0	1	0	2	1	3	0	0	0	1	0	2	1	0	1	0	0	2	0	14	0	1507.73	G3VNM4	G3VNM4	11	24	yes	yes	2	1.607e-45	227.92
HVGDLGNVK	GGPDDDERHVGDLGNV	VGDLGNVKADKDGVAT	R	H	V	V	K	A	0	0	1	1	0	0	0	2	1	0	1	1	0	0	0	0	0	0	0	2	0	9	0	937.498	G3VNM4	G3VNM4	83	91	yes	yes	2	0.0028295	106.88
QVGEPVELSGSIK	GTVFFEQKQVGEPVEL	VELSGSIKGLAEGYHG	K	Q	V	I	K	G	0	0	0	0	0	1	2	2	0	1	1	1	0	0	1	2	0	0	0	2	0	13	0	1341.71	G3VNM4	G3VNM4	25	37	yes	yes	2	3.3381e-10	161.87
AMGIMNSFVNDIFER	PDTGISSKAMGIMNSF	FVNDIFERIAGEASRL	K	A	M	E	R	I	1	1	2	1	0	0	1	1	0	2	0	0	2	2	0	1	0	0	0	1	0	15	0	1742.81	G3VNV7;G3VJ04;G3VIW9;G3VT75;G3VIL4;G3VFZ7;G3VA09;G3VME3	G3VNV7	59	73	yes	no	2	3.5043e-06	140.93				1		1		1
LLLPGELAK	REIQTAVRLLLPGELA	LLPGELAKHAVSEGTK	R	L	L	A	K	H	1	0	0	0	0	0	1	1	0	0	4	1	0	0	1	0	0	0	0	0	0	9	0	952.596	G3VNV7;G3VJ04;G3VIW9;G3VT75;G3VIL4;G3VFZ7;G3VA09;G3VME3	G3VNV7	101	109	yes	no	2	0.0013272	115.71				1		1		1
QVHPDTGISSK	IYVYKVLKQVHPDTGI	PDTGISSKAMGIMNSF	K	Q	V	S	K	A	0	0	0	1	0	1	0	1	1	1	0	1	0	0	1	2	1	0	0	1	0	11	0	1167.59	G3VNV7;G3VJ04;G3VIW9;G3VT75;G3VIL4;G3VFZ7;G3VA09	G3VNV7	48	58	yes	no	2	0.021551	67.385				1		1
AYHEQLSVAEITNACFEPANQMVK	APVISAEKAYHEQLSV	EPANQMVKCDPRHGKY	K	A	Y	V	K	C	4	0	2	0	1	2	3	0	1	1	1	1	1	1	1	1	1	0	1	2	0	24	0	2749.28	G3VPL9	G3VPL9	281	304	no	no	3	0.00015394	70.538							1
SIQFVDWCPTGFK	IATIKTKRSIQFVDWC	DWCPTGFKVGINYQPP	R	S	I	F	K	V	0	0	0	1	1	1	0	1	0	1	0	1	0	2	1	1	1	1	0	1	0	13	0	1583.74	G3VPL9;G3WJU5	G3VPL9	340	352	no	no	2	2.5432e-11	165.64							6
AVTEQGAELSNEER	DDMATCMKAVTEQGAE	AELSNEERNLLSVAYK	K	A	V	E	R	N	2	1	1	0	0	1	4	1	0	0	1	0	0	0	0	1	1	0	0	1	0	14	0	1531.71	G3VS43	G3VS43	28	41	yes	yes	2	0.025359	71.08
FLIANATNPESK	TVLELLDKFLIANATN	NATNPESKVFYLKMKG	K	F	L	S	K	V	2	0	2	0	0	0	1	0	0	1	1	1	0	1	1	1	1	0	0	0	0	12	0	1303.68	G3VS43	G3VS43	104	115	yes	yes	2	0.00058493	124.12
QTIDNSQGAYQEAFDISK	VACGDDRKQTIDNSQG	QEAFDISKKEMQPTHP	K	Q	T	S	K	K	2	0	1	2	0	3	1	1	0	2	0	1	0	1	0	2	1	0	1	0	0	18	0	2013.93	G3VS43	G3VS43	140	157	yes	yes	2	0.0071465	73.918
QTIDNSQGAYQEAFDISKK	VACGDDRKQTIDNSQG	EAFDISKKEMQPTHPI	K	Q	T	K	K	E	2	0	1	2	0	3	1	1	0	2	0	2	0	1	0	2	1	0	1	0	0	19	1	2142.02	G3VS43	G3VS43	140	158	yes	yes	3	0.03801	42.095
TAFDEAIAELDTLNEDSYK	ELACTLAKTAFDEAIA	TLNEDSYKDSTLIMQL	K	T	A	Y	K	D	3	0	1	3	0	0	3	0	0	1	2	1	0	1	0	1	2	0	1	0	0	19	0	2143.98	G3VS43	G3VS43	194	212	yes	yes	2	0.023401	51.225
AEGDVAALNR	GEREQREKAEGDVAAL	GDVAALNRRIQLVEEE	K	A	E	N	R	R	3	1	1	1	0	0	1	1	0	0	1	0	0	0	0	0	0	0	0	1	0	10	0	1014.51	G3VU66;G3VU65	G3VU66	42	51	yes	yes	2	0.011296	82.831		1
TIDDLEDELYAQK	RTVAKLEKTIDDLEDE	EDELYAQKLKYKAISE	K	T	I	Q	K	L	1	0	0	3	0	1	2	0	0	1	2	1	0	0	0	0	1	0	1	0	0	13	0	1551.73	G3VU66;G3VU65;G3WHT0	G3VU66	213	225	yes	no	2	0.0074774	99.732		1
ASGQAFELILSPR	QVKELEKRASGQAFEL	FELILSPRSKEAVPEF	R	A	S	P	R	S	2	1	0	0	0	1	1	1	0	1	2	0	0	1	1	2	0	0	0	0	0	13	0	1387.75	G3VVY5	G3VVY5	50	62	yes	yes	2	0.00023423	131.79								1
DLSLEEIQK	PLSPPKKKDLSLEEIQ	LSLEEIQKKLEAAEER	K	D	L	Q	K	K	0	0	0	1	0	1	2	0	0	1	2	1	0	0	0	1	0	0	0	0	0	9	0	1073.56	G3VVY5	G3VVY5	79	87	yes	yes	2	7.4483e-06	153.24								1
EAVPEFPLSPPK	LILSPRSKEAVPEFPL	EFPLSPPKKKDLSLEE	K	E	A	P	K	K	1	0	0	0	0	0	2	0	0	0	1	1	0	1	4	1	0	0	0	1	0	12	0	1309.69	G3VVY5	G3VVY5	65	76	yes	yes	2	0.0056114	91.961								1
KLEAAEER	LSLEEIQKKLEAAEER	KLEAAEERRKSHEAEV	K	K	L	E	R	R	2	1	0	0	0	0	3	0	0	0	1	1	0	0	0	0	0	0	0	0	0	8	1	944.493	G3VVY5;G3X0Z3;G3VYK5	G3VVY5	88	95	yes	no	2	0.030886	65.157								1
DKLESTINELK	GEFSGANKDKLESTIN	ESTINELK________	K	D	K	L	K	-	0	0	1	1	0	0	2	0	0	1	2	2	0	0	0	1	1	0	0	0	0	11	1	1288.69	G3VX55	G3VX55	95	105	yes	yes	2	2.941e-13	179.35
ENFESELK	MVKQIDSKENFESELK	ENFESELKGAGEKLVV	K	E	N	L	K	G	0	0	1	0	0	0	3	0	0	0	1	1	0	1	0	1	0	0	0	0	0	8	0	994.461	G3VX55	G3VX55	9	16	yes	yes	2	0.015817	80.219
AIVAIENPADVSVISSR	EKLLLAARAIVAIENP	DVSVISSRNTGQRAVL	R	A	I	S	R	N	3	1	1	1	0	0	1	0	0	3	0	0	0	0	1	3	0	0	0	3	0	17	0	1739.94	G3VXP4	G3VXP4	64	80	yes	yes	2	0.0073248	78.228
FAAATGATPIAGR	TGQRAVLKFAAATGAT	GATPIAGRFTPGTFTN	K	F	A	G	R	F	5	1	0	0	0	0	0	2	0	1	0	0	0	1	1	0	2	0	0	0	0	13	0	1202.64	G3VXP4	G3VXP4	90	102	yes	yes	2	0.0069537	101.72
SGALDVLQMKEEDVLK	________________	MKEEDVLKFLAAGTHL	M	S	G	L	K	F	1	0	0	2	0	1	2	1	0	0	3	2	1	0	0	1	0	0	0	2	0	16	1	1773.92	G3VXP4	G3VXP4	2	17	yes	yes	2	0.0015357	83.292
EVDEQMLAIQNK	FRGPMSMKEVDEQMLA	QMLAIQNKNSSYFVEW	K	E	V	N	K	N	1	0	1	1	0	2	2	0	0	1	1	1	1	0	0	0	0	0	0	1	0	12	0	1416.69	G3VXT3	G3VXT3	325	336	yes	yes	2	2.3945e-22	196.24
FWEVISDEHGIDPAGGYVGDSALQLER	CGNQIGTKFWEVISDE	DSALQLERINVYYNES	K	F	W	E	R	I	2	1	0	3	0	1	3	4	1	2	2	0	0	1	1	2	0	1	1	2	0	27	0	2959.4	G3VXT3	G3VXT3	20	46	yes	yes	3;4	5.0662e-46	201.29
IMNTFSVMPSPK	IREEYPDRIMNTFSVM	FSVMPSPKVSDTVVEP	R	I	M	P	K	V	0	0	1	0	0	0	0	0	0	1	0	1	2	1	2	2	1	0	0	1	0	12	0	1350.67	G3WMM3;G3VXT3	G3VXT3	163	174	no	no	2	2.3865e-22	186.76
INVYYNESSTQK	DSALQLERINVYYNES	YNESSTQKYVPRAILV	R	I	N	Q	K	Y	0	0	2	0	0	1	1	0	0	1	0	1	0	0	0	2	1	0	2	1	0	12	0	1444.68	G3VXT3	G3VXT3	47	58	yes	yes	2	2.0973e-22	195.72
ISEQFSAMFR	AIQELFKRISEQFSAM	EQFSAMFRRKAFLHWF	R	I	S	F	R	R	1	1	0	0	0	1	1	0	0	1	0	0	1	2	0	2	0	0	0	0	0	10	0	1214.58	G3VXT3	G3VXT3	381	390	yes	yes	2	2.6583e-13	172.61
MASTFIGNSTAIQELFK	DIPPRGLKMASTFIGN	TAIQELFKRISEQFSA	K	M	A	F	K	R	2	0	1	0	0	1	1	1	0	2	1	1	1	2	0	2	2	0	0	0	0	17	0	1856.93	G3VXT3	G3VXT3	363	379	yes	yes	2	0.002937	94.281
TITLEVEPSDTIENVK	FVKTLTGKTITLEVEP	SDTIENVKAKIQDKEG	K	T	I	V	K	A	0	0	1	1	0	0	3	0	0	2	1	1	0	0	1	1	3	0	0	2	0	16	0	1786.92	G3VYB0;G3VR81;G3WJ58;G3VD89	G3VYB0	12	27	yes	no	2	0.0036505	101.75	1
MSSTFIGNSTAIQELFK	DIPPRGLKMSSTFIGN	TAIQELFKRISEQFTA	K	M	S	F	K	R	1	0	1	0	0	1	1	1	0	2	1	1	1	2	0	3	2	0	0	0	0	17	0	1872.93	G3VYJ8	G3VYJ8	348	364	yes	yes	2	2.3305e-36	209.31
AILVDLEPGTMDSVR	TGGKYVPRAILVDLEP	PGTMDSVRSGPFGQIF	R	A	I	V	R	S	1	1	0	2	0	0	1	1	0	1	2	0	1	0	1	1	1	0	0	2	0	15	0	1614.83	G3WMM3;G3WM01;G3W108;G3W109;G3VYJ8;G3VXT3	G3W108	63	77	no	no	2;3	1.992e-71	246.63							1
ALTVPELTQQVFDAK	SRGSQQYRALTVPELT	TQQVFDAKNMMAACDP	R	A	L	A	K	N	2	0	0	1	0	2	1	0	0	0	2	1	0	1	1	0	2	0	0	2	0	15	0	1658.89	G3W108;G3W109	G3W108	283	297	yes	no	2;3	3.8579e-121	305.48							1
FWEVISDEHGIDPTGTYHGDSDLQLDR	CGNQIGAKFWEVISDE	DSDLQLDRISVYYNEA	K	F	W	D	R	I	0	1	0	5	0	1	2	3	2	2	2	0	0	1	1	2	2	1	1	1	0	27	0	3101.4	G3W108;G3W109	G3W108	20	46	yes	no	3;4	1.1046e-16	153.14
ISVYYNEATGGK	DSDLQLDRISVYYNEA	YNEATGGKYVPRAILV	R	I	S	G	K	Y	1	0	1	0	0	0	1	2	0	1	0	1	0	0	0	1	1	0	2	1	0	12	0	1300.63	G3W108;G3W109	G3W108	47	58	yes	no	2	2.0939e-41	223.36							1
MAVTFIGNSTAIQELFK	DIPPRGLKMAVTFIGN	TAIQELFKRISEQFTA	K	M	A	F	K	R	2	0	1	0	0	1	1	1	0	2	1	1	1	2	0	1	2	0	0	1	0	17	0	1868.97	G3W108;G3W109	G3W108	363	379	yes	no	2;3	1.2197e-89	265.6							1
NPDDITNEEYGEFYK	KTKPIWTRNPDDITNE	EEYGEFYKSLTNDWED	R	N	P	Y	K	S	0	0	2	2	0	0	3	1	0	1	0	1	0	1	1	0	1	0	2	0	0	15	0	1832.77	G3W1D6	G3W1D6	299	313	yes	yes	2	8.9101e-05	135.61
ALTVPELTQQMFDAK	SRGSQQYRALTVPELT	TQQMFDAKNMMAACDP	R	A	L	A	K	N	2	0	0	1	0	2	1	0	0	0	2	1	1	1	1	0	2	0	0	1	0	15	0	1690.86	G3W1X1;G3WEK2;G3VYJ8;G3VXT3	G3W1X1	283	297	no	no	2;3	1.3314e-119	296.25							1
AVLVDLEPGTMDSVR	TGGKYVPRAVLVDLEP	PGTMDSVRSGPFGQIF	R	A	V	V	R	S	1	1	0	2	0	0	1	1	0	0	2	0	1	0	1	1	1	0	0	3	0	15	0	1600.81	G3W1X1;G3WEK2	G3W1X1	63	77	yes	no	2	1.0174e-24	186.29
EIVHLQAGQCGNQIGAK	________________	CGNQIGAKFWEVISDE	R	E	I	A	K	F	2	0	1	0	1	3	1	3	1	2	1	1	0	0	0	0	0	0	0	1	0	17	0	1821.92	G3W1X1	G3W1X1	3	19	yes	yes	2;3	8.4703e-08	144.29
EVDEQMLNVQNK	FRGRMSMKEVDEQMLN	QMLNVQNKNSSYFVEW	K	E	V	N	K	N	0	0	2	1	0	2	2	0	0	0	1	1	1	0	0	0	0	0	0	2	0	12	0	1445.68	G3WMM3;G3W108;G3W109;G3W1X1;G3WEK2	G3W1X1	325	336	no	no	2	4.5134e-67	248.98							1
FWEVISDEHGIDPTGTYHGDSDLQLER	CGNQIGAKFWEVISDE	DSDLQLERINVYYNEA	K	F	W	E	R	I	0	1	0	4	0	1	3	3	2	2	2	0	0	1	1	2	2	1	1	1	0	27	0	3115.42	G3W1X1;G3WEK2	G3W1X1	20	46	yes	no	3;4	0.00038633	63.979
GHYTEGAELVDSVLDVVR	GAGNNWAKGHYTEGAE	DSVLDVVRKEAESCDC	K	G	H	V	R	K	1	1	0	2	0	0	2	2	1	0	2	0	0	0	0	1	1	0	1	4	0	18	0	1957.97	G3WMM3;G3WM01;G3W108;G3W109;G3W1X1;G3WEK2;G3VYJ8;G3VXT3	G3W1X1	104	121	no	no	2;3	2.665e-90	270.78							2
IMNTFSVVPSPK	IREEYPDRIMNTFSVV	FSVVPSPKVSDTVVEP	R	I	M	P	K	V	0	0	1	0	0	0	0	0	0	1	0	1	1	1	2	2	1	0	0	2	0	12	0	1318.7	G3W108;G3W109;G3W1X1;G3WEK2;G3VYJ8	G3W1X1	163	174	no	no	2	6.4231e-42	228.7							3
INVYYNEATGGK	DSDLQLERINVYYNEA	YNEATGGKYVPRAVLV	R	I	N	G	K	Y	1	0	2	0	0	0	1	2	0	1	0	1	0	0	0	0	1	0	2	1	0	12	0	1327.64	G3W1X1;G3WEK2	G3W1X1	47	58	yes	no	2	3.791e-10	166.62							1
ISEQFTAMFR	AIQELFKRISEQFTAM	EQFTAMFRRKAFLHWY	R	I	S	F	R	R	1	1	0	0	0	1	1	0	0	1	0	0	1	2	0	1	1	0	0	0	0	10	0	1228.59	G3WMM3;G3WM01;G3W108;G3W109;G3W1X1;G3WEK2;G3VYJ8	G3W1X1	381	390	no	no	2	2.8517e-78	261.35							2
MSATFIGNSTAIQELFK	DIPPRGLKMSATFIGN	TAIQELFKRISEQFTA	K	M	S	F	K	R	2	0	1	0	0	1	1	1	0	2	1	1	1	2	0	2	2	0	0	0	0	17	0	1856.93	G3WMM3;G3WM01;G3W1X1	G3W1X1	363	379	no	no	2	0.0013714	111.7
MSMKEVDEQMLNVQNK	VAAVFRGRMSMKEVDE	QMLNVQNKNSSYFVEW	R	M	S	N	K	N	0	0	2	1	0	2	2	0	0	0	1	2	3	0	0	1	0	0	0	2	0	16	1	1922.89	G3WMM3;G3W108;G3W109;G3W1X1;G3WEK2	G3W1X1	321	336	no	no	2	0.031172	48.899
NSSYFVEWIPNNVK	QMLNVQNKNSSYFVEW	EWIPNNVKTAVCDIPP	K	N	S	V	K	T	0	0	3	0	0	0	1	0	0	1	0	1	0	1	1	2	0	1	1	2	0	14	0	1695.83	G3WMM3;G3W108;G3W109;G3W1X1;G3WEK2;G3VYJ8;G3VXT3	G3W1X1	337	350	no	no	2;3	1.941e-58	244.71							1
VMNYLVLEENVDNDPCKFALMSR	YMFKRSIKVMNYLVLE	CKFALMSRETSERVVL	K	V	M	S	R	E	1	1	3	2	1	0	2	0	0	0	3	1	2	1	1	1	0	0	1	3	0	23	1	2756.3	G3W4S6	G3W4S6	487	509	yes	yes	3	0.0035271	54.15			1
ASAADSINFWVKNETRGMIDNLISSDLIDGMLTK	RNLNFEDKASAADSIN	LIDGMLTKLVLVNAIY	K	A	S	T	K	L	3	1	3	4	0	0	1	2	0	4	3	2	2	1	0	4	2	1	0	1	0	34	2	3724.84	G3W4X5	G3W4X5	154	187	yes	yes	4	0.00013669	53.197				1
ASAATTAILIAR	EVSEDGTKASAATTAI	TTAILIARSSPPWFIV	K	A	S	A	R	S	5	1	0	0	0	0	0	0	0	2	1	0	0	0	0	1	2	0	0	0	0	12	0	1157.68	G3W4X5	G3W4X5	360	371	yes	yes	1	0.03873	24.03
LKAQTVQNVVLMPMNNPK	KKQAQEHRLKAQTVQN	LMPMNNPKPPKRPRLQ	R	L	K	P	K	P	1	0	3	0	0	2	0	0	0	0	2	2	2	0	2	0	1	0	0	3	0	18	1	2024.09	G3W535	G3W535	358	375	yes	yes	2	0.035081	52.019	1
EIMAEIYK	YNVPSSEKEIMAEIYK	EIMAEIYKNGPVEGAF	K	E	I	Y	K	N	1	0	0	0	0	0	2	0	0	2	0	1	1	0	0	0	0	0	1	0	0	8	0	995.5	G3W5Z0	G3W5Z0	241	248	yes	yes	2	0.022583	78.516
HYGTTAYNVPSSEK	SPDYKDDKHYGTTAYN	YNVPSSEKEIMAEIYK	K	H	Y	E	K	E	1	0	1	0	0	0	1	1	1	0	0	1	0	0	1	2	2	0	2	1	0	14	0	1552.72	G3W5Z0	G3W5Z0	227	240	yes	yes	2	0.0099267	94.023
LPENFDAR	MLADDDMKLPENFDAR	LPENFDAREQWPKCPT	K	L	P	A	R	E	1	1	1	1	0	0	1	0	0	0	1	0	0	1	1	0	0	0	0	0	0	8	0	960.466	G3W5Z0;G3VGU0	G3W5Z0	82	89	yes	no	2	1.9074e-05	141.52
SGVYQHVTGDMLGGHAIR	YADFLQYKSGVYQHVT	MLGGHAIRVLGWGVED	K	S	G	I	R	V	1	1	0	1	0	1	0	4	2	1	1	0	1	0	0	1	1	0	1	2	0	18	0	1896.93	G3W5Z0	G3W5Z0	267	284	yes	yes	3	0.018894	47.223
ELLIIGGVAAR	YVDNPKLRELLIIGGV	IIGGVAARDQLSVLEQ	R	E	L	A	R	D	2	1	0	0	0	0	1	2	0	2	2	0	0	0	0	0	0	0	0	1	0	11	0	1110.68	G3W607	G3W607	317	327	yes	yes	2	0.00098224	113.44
YMLSMFQDILRFQSPASKMVR	ELPKEMNKYMLSMFQD	SPASKMVRRVLKEMVT	K	Y	M	V	R	R	1	2	0	1	0	2	0	0	0	1	2	1	3	2	1	3	0	0	1	1	0	21	2	2547.28	G3W6R1	G3W6R1	574	594	yes	yes	3	0.0077517	52.19	1
ESILTEELITEGK	VDSHKVTKESILTEEL	EELITEGKWVKLEQTT	K	E	S	G	K	W	0	0	0	0	0	0	4	1	0	2	2	1	0	0	0	1	2	0	0	0	0	13	0	1460.76	G3W6S0;G3W6S1	G3W6S0	15	27	yes	no	2	0.0063593	103.97
LGDGEFVEVVSLPK	ENVRPKPKLGDGEFVE	VEVVSLPKNDLLKRID	K	L	G	P	K	N	0	0	0	1	0	0	2	2	0	0	2	1	0	1	1	1	0	0	0	3	0	14	0	1487.79	G3W6S0	G3W6S0	163	176	yes	yes	2	0.00026017	130.61
DLEDLQILIK	PFDKWDGRDLEDLQIL	EDLQILIKVKGKCTTD	R	D	L	I	K	V	0	0	0	2	0	1	1	0	0	2	3	1	0	0	0	0	0	0	0	0	0	10	0	1198.68	G3W8J9	G3W8J9	582	591	yes	yes	2	0.007869	90.05
EGWPLDIR	NVGAVAEKEGWPLDIR	EGWPLDIRVGLIGSCT	K	E	G	I	R	V	0	1	0	1	0	0	1	1	0	1	1	0	0	0	1	0	0	1	0	0	0	8	0	984.503	G3W8J9	G3W8J9	375	382	yes	yes	2	0.0267	71.379
QGLLPLTFADPADYNK	IHETNLKKQGLLPLTF	ADPADYNKIHPVDKLT	K	Q	G	N	K	I	2	0	1	2	0	1	0	1	0	0	3	1	0	1	2	0	1	0	1	0	0	16	0	1761.89	G3W8J9	G3W8J9	706	721	yes	yes	2	0.040992	60.631
WVVIGDENYGEGSSR	YYKKNGIKWVVIGDEN	NYGEGSSREHAALEPR	K	W	V	S	R	E	0	1	1	1	0	0	2	3	0	1	0	0	0	0	0	2	0	1	1	2	0	15	0	1666.76	G3W8J9	G3W8J9	661	675	yes	yes	2	0.006129	100.68
AEEYEFLTPVEEAPK	MVGSYGPRAEEYEFLT	TPVEEAPKGMLARGSY	R	A	E	P	K	G	2	0	0	0	0	0	5	0	0	0	1	1	0	1	2	0	1	0	1	1	0	15	0	1750.83	G3WB53	G3WB53	153	167	yes	yes	2	3.2134e-18	185.32
AEQEPTAEQLAQIAAENEEDEHSVNYKPPAQK	________________	NYKPPAQKSIQEIQEL	M	A	E	Q	K	S	6	0	2	1	0	4	7	0	1	1	1	2	0	0	3	1	1	0	1	1	0	32	1	3563.67	G3WB53	G3WB53	2	33	yes	yes	3	0.0059987	43.206
IDKTDYMVGSYGPR	HTYRKGVKIDKTDYMV	MVGSYGPRAEEYEFLT	K	I	D	P	R	A	0	1	0	2	0	0	0	2	0	1	0	1	1	0	1	1	1	0	2	1	0	14	1	1600.76	G3WB53	G3WB53	139	152	yes	yes	2	0.00023586	140.03
SIQEIQELDKDDESLR	NYKPPAQKSIQEIQEL	DKDDESLRKYKEALLG	K	S	I	L	R	K	0	1	0	3	0	2	3	0	0	2	2	1	0	0	0	2	0	0	0	0	0	16	1	1916.93	G3WB53	G3WB53	34	49	yes	yes	2;3	1.534e-57	234.36
TDYMVGSYGPR	RKGVKIDKTDYMVGSY	MVGSYGPRAEEYEFLT	K	T	D	P	R	A	0	1	0	1	0	0	0	2	0	0	0	0	1	0	1	1	1	0	2	1	0	11	0	1244.55	G3WB53	G3WB53	142	152	yes	yes	2	0.00057534	129.88
YIQHTYR	REIVSGMKYIQHTYRK	KYIQHTYRKGVKIDKT	K	Y	I	Y	R	K	0	1	0	0	0	1	0	0	1	1	0	0	0	0	0	0	1	0	2	0	0	7	0	979.488	G3WB53	G3WB53	128	134	yes	yes	2	0.0026062	116.73
DLESELVK	VAVIGLFKDLESELVK	DLESELVKQFTLAAES	K	D	L	V	K	Q	0	0	0	1	0	0	2	0	0	0	2	1	0	0	0	1	0	0	0	1	0	8	0	931.486	G3WBV2	G3WBV2	165	172	yes	yes	2	0.0039353	106.36					1
EAEDIVNWLK	PKEYTAGREAEDIVNW	EDIVNWLKKRTSPAVT	R	E	A	L	K	K	1	0	1	1	0	0	2	0	0	1	1	1	0	0	0	0	0	1	0	1	0	10	0	1215.61	G3WBV2	G3WBV2	123	132	yes	yes	2	0.00055875	134.84					1
LITLEEEMTK	KEECPAVRLITLEEEM	TLEEEMTKYKPESDEL	R	L	I	T	K	Y	0	0	0	0	0	0	3	0	0	1	2	1	1	0	0	0	2	0	0	0	0	10	0	1205.62	G3WBV2	G3WBV2	319	328	yes	yes	2	0.024335	75.509					1
LPLVIEFTEQTAPK	LTFVNYHRLPLVIEFT	FTEQTAPKIFGGEIKT	R	L	P	P	K	I	1	0	0	0	0	1	2	0	0	1	2	1	0	1	2	0	2	0	0	1	0	14	0	1584.88	G3WBV2	G3WBV2	236	249	yes	yes	2	0.0021076	121.24					1
MDSTANEVEAVK	HESIVIAKMDSTANEV	ANEVEAVKVHSFPTLK	K	M	D	V	K	V	2	0	1	1	0	0	2	0	0	0	0	1	1	0	0	1	1	0	0	2	0	12	0	1292.59	G3WBV2	G3WBV2	427	438	yes	yes	2	0.011547	80.312					1
NFEEIAFDEK	PVKVLVGKNFEEIAFD	EEIAFDEKKNVFVEFY	K	N	F	E	K	K	1	0	1	1	0	0	3	0	0	1	0	1	0	2	0	0	0	0	0	0	0	10	0	1240.56	G3WBV2	G3WBV2	378	387	yes	yes	2	0.00093395	130.1					1
QLAPIWDK	APWCGHCKQLAPIWDK	QLAPIWDKLGETYKDH	K	Q	L	D	K	L	1	0	0	1	0	1	0	0	0	1	1	1	0	0	1	0	0	1	0	0	0	8	0	969.528	G3WBV2	G3WBV2	404	411	yes	yes	2	0.012309	85.676					1
VDATEESDLAQQYGVR	GSKIRLAKVDATEESD	LAQQYGVRGYPTIKFF	K	V	D	V	R	G	2	1	0	2	0	2	2	1	0	0	1	0	0	0	0	1	1	0	1	2	0	16	0	1779.83	G3WBV2	G3WBV2	84	99	yes	yes	2	8.2477e-08	151.38					1
VKKGGSYMCHK	GPHSGSNRVKKGGSYM	GGSYMCHKSYCYRYRC	R	V	K	H	K	S	0	0	0	0	1	0	0	2	1	0	0	3	1	0	0	1	0	0	1	1	0	11	2	1293.63	G3WCA6;G3WCA5	G3WCA6	244	254	yes	no	2	0.038482	42.802			1
AVTEQGHELSNEER	DDMAAAMKAVTEQGHE	HELSNEERNLLSVAYK	K	A	V	E	R	N	1	1	1	0	0	1	4	1	1	0	1	0	0	0	0	1	1	0	0	1	0	14	0	1597.73	G3WCJ6	G3WCJ6	30	43	yes	yes	2	2.8532e-05	140.27
QTTVSNSQQAYQEAFEISK	EVASGDNKQTTVSNSQ	QEAFEISKKEMQPTHP	K	Q	T	S	K	K	2	0	1	0	0	4	2	0	0	1	0	1	0	1	0	3	2	0	1	1	0	19	0	2158.02	G3WCJ6	G3WCJ6	141	159	yes	yes	2	0.0001586	114.55
TAFDEAIAELDTLNEESYK	EKACSLAKTAFDEAIA	TLNEESYKDSTLIMQL	K	T	A	Y	K	D	3	0	1	2	0	0	4	0	0	1	2	1	0	1	0	1	2	0	1	0	0	19	0	2158	G3WCJ6	G3WCJ6	196	214	yes	yes	2	0.0017094	77.871
YDDMAAAMK	KLAEQAERYDDMAAAM	DDMAAAMKAVTEQGHE	R	Y	D	M	K	A	3	0	0	2	0	0	0	0	0	0	0	1	2	0	0	0	0	0	1	0	0	9	0	1014.42	G3WCJ6	G3WCJ6	21	29	yes	yes	2	0.00049746	120.99
YLILNATQPESK	DVLELLDKYLILNATQ	NATQPESKVFYLKMKG	K	Y	L	S	K	V	1	0	1	0	0	1	1	0	0	1	2	1	0	0	1	1	1	0	1	0	0	12	0	1375.73	G3WCJ6	G3WCJ6	106	117	yes	yes	2	5.7085e-23	198.97
YLSEVASGDNK	KMKGDYFRYLSEVASG	EVASGDNKQTTVSNSQ	R	Y	L	N	K	Q	1	0	1	1	0	0	1	1	0	0	1	1	0	0	0	2	0	0	1	1	0	11	0	1181.56	G3WCJ6	G3WCJ6	130	140	yes	yes	2	0.00066275	123.96
LERRQATDDASLLIVNR	ELREHIEKLERRQATD	ASLLIVNRYWSQFDEN	K	L	E	N	R	Y	2	3	1	2	0	1	1	0	0	1	3	0	0	0	0	1	1	0	0	1	0	17	2	1969.07	G3WDN4;G3WDN3	G3WDN4	79	95	yes	no	2	0.0001162	101.53	10
AEDNADTLALIFEAPNQEK	NEDIITLRAEDNADTL	FEAPNQEKVSDYEMKL	R	A	E	E	K	V	4	0	2	2	0	1	3	0	0	1	2	1	0	1	1	0	1	0	0	0	0	19	0	2088	G3WDY3	G3WDY3	92	110	yes	yes	2;3	4.2088e-13	159.18		2
ATPLSPTVTLSMSADVPLVVEYK	RYLNFFTKATPLSPTV	VPLVVEYKIADMGHLK	K	A	T	Y	K	I	2	0	0	1	0	0	1	0	0	0	3	1	1	0	3	3	3	0	1	4	0	23	0	2417.28	G3WDY3	G3WDY3	218	240	yes	yes	3	0.015138	46.099		1
LSQTSNVDKEEEAVTIEMNEPVQLTFALR	ELGSGNVKLSQTSNVD	VQLTFALRYLNFFTKA	K	L	S	L	R	Y	2	1	2	1	0	2	5	0	0	1	3	1	1	1	1	2	3	0	0	3	0	29	1	3290.63	G3WDY3	G3WDY3	182	210	yes	yes	3	0.00015358	65.741		2
NLAMGVNLTSMSK	FDTYRCDRNLAMGVNL	VNLTSMSKILKCASNE	R	N	L	S	K	I	1	0	2	0	0	0	0	1	0	0	2	1	2	0	0	2	1	0	0	1	0	13	0	1364.68	G3WDY3	G3WDY3	65	77	yes	yes	2	0.0031064	100.73		1
YLNFFTK	VQLTFALRYLNFFTKA	RYLNFFTKATPLSPTV	R	Y	L	T	K	A	0	0	1	0	0	0	0	0	0	0	1	1	0	2	0	0	1	0	1	0	0	7	0	931.48	G3WDY3	G3WDY3	211	217	yes	yes	2	0.014685	87.181		1
CIMQATDIMR	RSHGLLPKCIMQATDI	MQATDIMRKQGPRVEI	K	C	I	M	R	K	1	1	0	1	1	1	0	0	0	2	0	0	2	0	0	0	1	0	0	0	0	10	0	1237.56	G3WEP5	G3WEP5	1458	1467	yes	yes	2	0.028096	48.091							1
IFSCSATLYFANAELYRK	AKEVPGIKIFSCSATL	ANAELYRKALSNKIGL	K	I	F	R	K	A	3	1	1	0	1	0	1	0	0	1	2	1	0	2	0	2	1	0	2	0	0	18	1	2153.06	G3WFG9	G3WFG9	546	563	yes	yes	2;3	0.0032754	78.191			2
PVIVEPLEQLDDEDGLPEK	FLLTTTPRPVIVEPLE	DEDGLPEKLAQKHPMY	R	P	V	E	K	L	0	0	0	3	0	1	4	1	0	1	3	1	0	0	3	0	0	0	0	2	0	19	0	2134.07	G3WG64;G3WU71	G3WG64	88	106	yes	no	2	0.00061867	81.807
TNEKVELQELNDR	NQEFLTTRTNEKVELQ	ELQELNDRFANYIEKV	R	T	N	D	R	F	0	1	2	1	0	1	3	0	0	0	2	1	0	0	0	0	1	0	0	1	0	13	1	1586.79	G3WHB8	G3WHB8	108	120	yes	yes	2;3	1.1059e-113	291.75			3				1
VELQELNDR	LTTRTNEKVELQELND	ELQELNDRFANYIEKV	K	V	E	D	R	F	0	1	1	1	0	1	2	0	0	0	2	0	0	0	0	0	0	0	0	1	0	9	0	1114.56	G3WHB8	G3WHB8	112	120	yes	yes	2	7.7411e-30	215.72			1				1
DNLTLWTSDTQGDEAEAGEGGEN	TLIMQLLRDNLTLWTS	EAGEGGEN________	R	D	N	E	N	-	2	0	2	3	0	1	4	4	0	0	2	0	0	0	0	1	3	1	0	0	0	23	0	2407.99	G3WHE0	G3WHE0	223	245	yes	yes	2	4.9326e-09	118.32
DSTLIMQLLR	TLSEESYKDSTLIMQL	TLIMQLLRDNLTLWTS	K	D	S	L	R	D	0	1	0	1	0	1	0	0	0	1	3	0	1	0	0	1	1	0	0	0	0	10	0	1188.65	G3WP04;G3VE53;G3VS43;G3WHE0;G3WCJ6	G3WHE0	213	222	no	no	2	5.4747e-21	199.11		1
EKIETELR	QQMAREYREKIETELR	EKIETELRDICNDVLS	R	E	K	L	R	D	0	1	0	0	0	0	3	0	0	1	1	1	0	0	0	0	1	0	0	0	0	8	1	1016.55	G3WHE0	G3WHE0	84	91	yes	yes	2	0.00012871	143.37
EMQPTHPIR	EAFEISKKEMQPTHPI	MQPTHPIRLGLALNFS	K	E	M	I	R	L	0	1	0	0	0	1	1	0	1	1	0	0	1	0	2	0	1	0	0	0	0	9	0	1107.55	G3VS43;G3WHE0;G3WCJ6	G3WHE0	159	167	no	no	2	0.015295	83.998
FLIPNASQAESK	DVLSLLEKFLIPNASQ	NASQAESKVFYLKMKG	K	F	L	S	K	V	2	0	1	0	0	1	1	0	0	1	1	1	0	1	1	2	0	0	0	0	0	12	0	1303.68	G3WHE0	G3WHE0	104	115	yes	yes	2	2.299e-05	140.45
GIVDQSQQAYQEAFEISK	VAAGDDKKGIVDQSQQ	QEAFEISKKEMQPTHP	K	G	I	S	K	K	2	0	0	1	0	4	2	1	0	2	0	1	0	1	0	2	0	0	1	1	0	18	0	2039.98	G3WHE0	G3WHE0	140	157	yes	yes	2;3	9.4819e-125	292.19
MDKNELVQK	________________	DKNELVQKAKLAEQAE	-	M	D	Q	K	A	0	0	1	1	0	1	1	0	0	0	1	2	1	0	0	0	0	0	0	1	0	9	1	1103.56	G3WHE0	G3WHE0	1	9	yes	yes	2	0.00094834	104.82
SVTEQGAELSNEER	DDMAACMKSVTEQGAE	AELSNEERNLLSVAYK	K	S	V	E	R	N	1	1	1	0	0	1	4	1	0	0	1	0	0	0	0	2	1	0	0	1	0	14	0	1547.71	G3WHE0	G3WHE0	28	41	yes	yes	2	5.6942e-45	219.95
TAFDEAIAELDTLSEESYK	EKACSLAKTAFDEAIA	TLSEESYKDSTLIMQL	K	T	A	Y	K	D	3	0	0	2	0	0	4	0	0	1	2	1	0	1	0	2	2	0	1	0	0	19	0	2130.98	G3WHE0	G3WHE0	194	212	yes	yes	2;3	1.2061e-62	245.04
YLAEVAAGDDK	KMKGDYYRYLAEVAAG	EVAAGDDKKGIVDQSQ	R	Y	L	D	K	K	3	0	0	2	0	0	1	1	0	0	1	1	0	0	0	0	0	0	1	1	0	11	0	1150.55	G3WHE0	G3WHE0	128	138	yes	yes	2	0.028361	64.224
YLAEVAAGDDKK	KMKGDYYRYLAEVAAG	VAAGDDKKGIVDQSQQ	R	Y	L	K	K	G	3	0	0	2	0	0	1	1	0	0	1	2	0	0	0	0	0	0	1	1	0	12	1	1278.65	G3WHE0	G3WHE0	128	139	yes	yes	2	1.4437e-06	149.41
AKMAAAVVSPVGVEETVIR	________________	GVEETVIRGRGGDAAG	-	A	K	I	R	G	4	1	0	0	0	0	2	1	0	1	0	1	1	0	1	1	1	0	0	5	0	19	1	1926.06	G3WIG4;G3WIG3	G3WIG4	1	19	yes	no	2;3	0.0014947	69.485	6
LAVNMVPYPR	QLNADLRKLAVNMVPY	VNMVPYPRLHFFMPGF	K	L	A	P	R	L	1	1	1	0	0	0	0	0	0	0	1	0	1	0	2	0	0	0	1	2	0	10	0	1158.62	G3WIQ8	G3WIQ8	253	262	yes	yes	2	0.0091935	91.265
AFVHWYVGEGMEEGEFSEAR	FDLMYAKRAFVHWYVG	EGEFSEAREDMAALEK	R	A	F	A	R	E	2	1	0	0	0	0	5	3	1	0	0	0	1	2	0	1	0	1	1	2	0	20	0	2329.01	G3WJK7;G3WFK2;G3WSM9;G3WJU5	G3WJK7	444	463	no	no	2;3	9.3419e-23	183.31							8
AVFVDLEPTVIDEVR	GAGKHVPRAVFVDLEP	PTVIDEVRTGTYRQLF	R	A	V	V	R	T	1	1	0	2	0	0	2	0	0	1	1	0	0	1	1	0	1	0	0	4	0	15	0	1700.9	G3VPL9;G3VQI3;G3WJK7	G3WJK7	106	120	no	no	2;3	5.3088e-72	256.13			1				9	1
DVNAAIATIK	YRGDVVPKDVNAAIAT	NAAIATIKTKRTIQFV	K	D	V	I	K	T	3	0	1	1	0	0	0	0	0	2	0	1	0	0	0	0	1	0	0	1	0	10	0	1014.57	G3VPL9;G3WJK7;G3WSM9	G3WJK7	368	377	no	no	2	1.6489e-05	150.06			1				4
EDAANNYAR	PEQLITGKEDAANNYA	DAANNYARGHYTIGKE	K	E	D	A	R	G	3	1	2	1	0	0	1	0	0	0	0	0	0	0	0	0	0	0	1	0	0	9	0	1022.44	G3VPL9;G3VVI1;G3WJK7;G3WFK2;G3WSM9;G3WJU5	G3WJK7	138	146	no	no	2	0.02378	73.665							1
ELIDLVLDR	RGHYTIGKELIDLVLD	LIDLVLDRIRKLADQC	K	E	L	D	R	I	0	1	0	2	0	0	1	0	0	1	3	0	0	0	0	0	0	0	0	1	0	9	0	1084.61	G3WJK7	G3WJK7	154	162	yes	yes	2	2.2515e-38	218.58			1				5	1
FDGALNVDLTEFQTNLVPYPR	SSITASLRFDGALNVD	TNLVPYPRIHFPLATY	R	F	D	P	R	I	1	1	2	2	0	1	1	1	0	0	3	0	0	2	2	0	2	0	1	2	0	21	0	2408.2	G3VPL9;G3WJK7;G3WFK2;G3WSM9;G3WJU5	G3WJK7	285	305	no	no	2;3	1.7643e-30	197.05							2
IHFPLATYAPVISAEK	TNLVPYPRIHFPLATY	APVISAEKAYHEQLSV	R	I	H	E	K	A	3	0	0	0	0	0	1	0	1	2	1	1	0	1	2	1	1	0	1	1	0	16	0	1755.96	G3VPL9;G3VQI3;G3WJK7;G3WJU5	G3WJK7	306	321	no	no	2;3	9.4775e-36	214.45							4
LDHKFDLMYAK	AIAEAWARLDHKFDLM	KFDLMYAKRAFVHWYV	R	L	D	A	K	R	1	0	0	2	0	0	0	0	1	0	2	2	1	1	0	0	0	0	1	0	0	11	1	1379.69	G3WJK7;G3WFK2;G3WSM9;G3WJU5	G3WJK7	432	442	no	no	2;3	5.1174e-05	150.09							13
NLDIERPTYTNLNR	AIYDICRRNLDIERPT	PTYTNLNRLIGQIVSS	R	N	L	N	R	L	0	2	3	1	0	0	1	0	0	1	2	0	0	0	1	0	2	0	1	0	0	14	1	1717.87	G3VPL9;G3VQI3;G3WJK7;G3WFK2;G3WSM9;G3WJU5	G3WJK7	257	270	no	no	2;3	1.6942e-16	182.72							6
PTYTNLNR	RRNLDIERPTYTNLNR	PTYTNLNRLIGQIVSS	R	P	T	N	R	L	0	1	2	0	0	0	0	0	0	0	1	0	0	0	1	0	2	0	1	0	0	8	0	977.493	G3VPL9;G3VQI3;G3WJK7;G3WFK2;G3WSM9;G3WJU5	G3WJK7	263	270	no	no	2	0.030405	68.371							1
QLFHPEQLITGK	EVRTGTYRQLFHPEQL	PEQLITGKEDAANNYA	R	Q	L	G	K	E	0	0	0	0	0	2	1	1	1	1	2	1	0	1	1	0	1	0	0	0	0	12	0	1409.77	G3VPL9;G3VQI3;G3VVI1;G3WJK7;G3WFK2;G3WJU5	G3WJK7	126	137	no	no	2;3	2.71e-41	221.09							2
QLFHPEQLITGKEDAANNYAR	EVRTGTYRQLFHPEQL	DAANNYARGHYTIGKE	R	Q	L	A	R	G	3	1	2	1	0	2	2	1	1	1	2	1	0	1	1	0	1	0	1	0	0	21	1	2414.2	G3VPL9;G3VVI1;G3WJK7;G3WFK2;G3WJU5	G3WJK7	126	146	no	no	3;4	3.3471e-06	111.09							2
TIQFVDWCPTGFK	IATIKTKRTIQFVDWC	DWCPTGFKVGINYQPP	R	T	I	F	K	V	0	0	0	1	1	1	0	1	0	1	0	1	0	2	1	0	2	1	0	1	0	13	0	1597.76	G3WJK7;G3WFK2;G3WSM9	G3WJK7	381	393	no	no	2	3.6699e-11	170.26							1
VGINYQPPTVVPGGDLAK	DWCPTGFKVGINYQPP	VPGGDLAKVQRAVCML	K	V	G	A	K	V	1	0	1	1	0	1	0	3	0	1	1	1	0	0	3	0	1	0	1	3	0	18	0	1823.98	G3VPL9;G3WJK7;G3WFK2;G3WSM9;G3WJU5	G3WJK7	394	411	no	no	2;3	7.98e-09	154.31			1				6	1
AVFVDLEPTVIDEIR	GAGKHVPRAVFVDLEP	PTVIDEIRNGPYKQLF	R	A	V	I	R	N	1	1	0	2	0	0	2	0	0	2	1	0	0	1	1	0	1	0	0	3	0	15	0	1714.91	G3WJU5	G3WJU5	65	79	yes	yes	2	5.2561e-05	138.01							1
DSKDGSIEVTGQLGEIMK	SLRRPKDKDSKDGSIE	GQLGEIMKESAKIAYT	K	D	S	M	K	E	0	0	0	2	0	1	2	3	0	2	1	2	1	0	0	2	1	0	0	1	0	18	1	1905.94	G3WK87	G3WK87	690	707	yes	yes	2	0.034585	53.255							1
SVGGTGGSSFGDSLVTR	VTVTRSYRSVGGTGGS	FGDSLVTRSYLLGNSR	R	S	V	T	R	S	0	1	0	1	0	0	0	5	0	0	1	0	0	1	0	4	2	0	0	2	0	17	0	1582.76	G3WL00;G3WL01	G3WL00	469	485	yes	no	2	2.3962e-06	140.8
TALISATGEEVAMR	WGCGNSLRTALISATG	TGEEVAMRKLVRTVTV	R	T	A	M	R	K	3	1	0	0	0	0	2	1	0	1	1	0	1	0	0	1	2	0	0	1	0	14	0	1447.73	G3WL00;G3WL01	G3WL00	370	383	yes	no	2	1.6626e-24	187.74
ALTVPELTQQMFDSK	SRGSQQYRALTVPELT	TQQMFDSKNMMAACDP	R	A	L	S	K	N	1	0	0	1	0	2	1	0	0	0	2	1	1	1	1	1	2	0	0	1	0	15	0	1706.85	G3WMM3	G3WMM3	283	297	yes	yes	2;3	2.117e-34	209.56
INVYYNEAAGNK	DSDLQLERINVYYNEA	YNEAAGNKYVPRAILV	R	I	N	N	K	Y	2	0	3	0	0	0	1	1	0	1	0	1	0	0	0	0	0	0	2	1	0	12	0	1354.65	G3WMM3	G3WMM3	47	58	yes	yes	2	0.0026232	108.32
AAFDDAIAELDTLSEESYK	DRACRLAKAAFDDAIA	TLSEESYKDSTLIMQL	K	A	A	Y	K	D	4	0	0	3	0	0	3	0	0	1	2	1	0	1	0	2	1	0	1	0	0	19	0	2086.96	G3WP04	G3WP04	175	193	yes	yes	2	4.7362e-09	151.41		1
AASDIAMTELPPTHPIR	ENSLVAYKAASDIAMT	LPPTHPIRLGLALNFS	K	A	A	I	R	L	3	1	0	1	0	0	1	0	1	2	1	0	1	0	3	1	2	0	0	0	0	17	0	1818.93	G3WP04	G3WP04	132	148	yes	yes	2	0.0032789	98.421
EAAENSLVAYK	FATGNDRKEAAENSLV	ENSLVAYKAASDIAMT	K	E	A	Y	K	A	3	0	1	0	0	0	2	0	0	0	1	1	0	0	0	1	0	0	1	1	0	11	0	1193.59	G3WP04	G3WP04	121	131	yes	yes	2	0.0014531	108.9
EALQDVEDENQ	GDGEEQNKEALQDVED	QDVEDENQ________	K	E	A	N	Q	-	1	0	1	2	0	2	3	0	0	0	1	0	0	0	0	0	0	0	0	1	0	11	0	1288.54	G3WP04	G3WP04	223	233	yes	yes	2	0.0065226	87.568
VAGMDVELTVEER	________________	VELTVEERNLLSVAYK	K	V	A	E	R	N	1	1	0	1	0	0	3	1	0	0	1	0	1	0	0	0	1	0	0	3	0	13	0	1446.7	G3WP04	G3WP04	8	20	yes	yes	2	2.6723e-15	175.74		1
YLAEFATGNDR	KMKGDYHRYLAEFATG	EFATGNDRKEAAENSL	R	Y	L	D	R	K	2	1	1	1	0	0	1	1	0	0	1	0	0	1	0	0	1	0	1	0	0	11	0	1255.58	G3WP04	G3WP04	109	119	yes	yes	2	0.00082051	118.77
YLAEFATGNDRK	KMKGDYHRYLAEFATG	FATGNDRKEAAENSLV	R	Y	L	R	K	E	2	1	1	1	0	0	1	1	0	0	1	1	0	1	0	0	1	0	1	0	0	12	1	1383.68	G3WP04	G3WP04	109	120	yes	yes	2	0.015018	71.176
DGQVINETSQHHDDLE	LIKTVETRDGQVINET	SQHHDDLE________	R	D	G	L	E	-	0	0	1	3	0	2	2	1	2	1	1	0	0	0	0	1	1	0	0	1	0	16	0	1835.79	G3WPL8	G3WPL8	274	289	yes	yes	2	9.1818e-87	266.85			1				1
EEAETTLQSFR	LQEEMMQREEAETTLQ	ETTLQSFRQDVDNASL	R	E	E	F	R	Q	1	1	0	0	0	1	3	0	0	0	1	0	0	1	0	1	2	0	0	0	0	11	0	1309.62	G3WPL8	G3WPL8	20	30	yes	yes	2	9.4161e-65	248.98	1		1				1
EMEENFAVEAANYQDTIGR	ESLERQMREMEENFAV	NYQDTIGRLQDEIQNM	R	E	M	G	R	L	3	1	2	1	0	1	4	1	0	1	0	0	1	1	0	0	1	0	1	1	0	19	0	2185.96	G3WPL8	G3WPL8	169	187	yes	yes	2;3	2.2743e-125	295.16			5				4
ETNLESHPMVDTHSK	NFSSLNLRETNLESHP	PMVDTHSKRTLLIKTV	R	E	T	S	K	R	0	0	1	1	0	0	2	0	2	0	1	1	1	0	1	2	2	0	0	1	0	15	0	1723.78	G3WPL8	G3WPL8	248	262	yes	yes	2	1.9862e-17	181.75			2				2
EYQDLLNVK	EEMARHLREYQDLLNV	YQDLLNVKMALDIEIA	R	E	Y	V	K	M	0	0	1	1	0	1	1	0	0	0	2	1	0	0	0	0	0	0	1	1	0	9	0	1120.58	G3WPL8;G3WL72;G3X1X5;G3VX42;G3VF04;G3WHB8	G3WPL8	205	213	no	no	2	1.8924e-63	257.27			1				2
FADLSEAANR	AEEWYKSKFADLSEAA	DLSEAANRNNDALRQA	K	F	A	N	R	N	3	1	1	1	0	0	1	0	0	0	1	0	0	1	0	1	0	0	0	0	0	10	0	1092.52	G3WPL8	G3WPL8	118	127	yes	yes	2	1.0596e-28	201.61	1		1				1
KLLEGEESR	DIEIATYRKLLEGEES	LLEGEESRIALPLPNF	R	K	L	S	R	I	0	1	0	0	0	0	3	1	0	0	2	1	0	0	0	1	0	0	0	0	0	9	1	1059.56	G3WPL8;G3VSD9;G3WL72;G3W3D6;CON__Q9DCV7;CON__Q3KNV1;CON__P08729;CON__P05787;CON__Q9H552;G3VJ06;G3WHB8	G3WPL8	225	233	no	no	2	0.00052482	132.25			1				1
KVESLQEEIAFLK	LARLDLERKVESLQEE	QEEIAFLKKLHEEEIQ	R	K	V	L	K	K	1	0	0	0	0	1	3	0	0	1	2	2	0	1	0	1	0	0	0	1	0	13	1	1532.85	G3WPL8	G3WPL8	46	58	yes	yes	2;3	3.9444e-229	378.62			2				2
KVESLQEEIAFLKK	LARLDLERKVESLQEE	EEIAFLKKLHEEEIQE	R	K	V	K	K	L	1	0	0	0	0	1	3	0	0	1	2	3	0	1	0	1	0	0	0	1	0	14	2	1660.94	G3WPL8	G3WPL8	46	59	yes	yes	2;3	7.6584e-182	340.92			2				1
LHEEEIQELQAQIQEQHVQIEVDVAK	EEIAFLKKLHEEEIQE	QIEVDVAKPDLTAALR	K	L	H	A	K	P	2	0	0	1	0	6	6	0	2	3	2	1	0	0	0	0	0	0	0	3	0	26	0	3082.56	G3WPL8	G3WPL8	60	85	yes	yes	4	6.5972e-05	67.11			1
LHEEEIQELQAQIQEQHVQIEVDVAKPDLTAALR	EEIAFLKKLHEEEIQE	PDLTAALRDVRQQYES	K	L	H	L	R	D	4	1	0	2	0	6	6	0	2	3	4	1	0	0	1	0	1	0	0	3	0	34	1	3920.03	G3WPL8	G3WPL8	60	93	yes	yes	4	0.0040261	46.668			1
LLEGEESR	IEIATYRKLLEGEESR	LLEGEESRIALPLPNF	K	L	L	S	R	I	0	1	0	0	0	0	3	1	0	0	2	0	0	0	0	1	0	0	0	0	0	8	0	931.461	G3WPL8;G3VSD9;G3WL72;G3W3D6;CON__Q9DCV7;CON__Q3KNV1;CON__P08729;CON__P05787;CON__Q9H552;G3VJ06;CON__Q9NSB2;CON__Q6ISB0;G3WHB8	G3WPL8	226	233	no	no	2	6.3341e-09	167.23			1				1
LQDEIQNMK	NYQDTIGRLQDEIQNM	QDEIQNMKEEMARHLR	R	L	Q	M	K	E	0	0	1	1	0	2	1	0	0	1	1	1	1	0	0	0	0	0	0	0	0	9	0	1117.54	G3WPL8	G3WPL8	188	196	yes	yes	2	0.00085883	128.91			2				1
LQDEIQNMKEEMAR	NYQDTIGRLQDEIQNM	NMKEEMARHLREYQDL	R	L	Q	A	R	H	1	1	1	1	0	2	3	0	0	1	1	1	2	0	0	0	0	0	0	0	0	14	1	1733.81	G3WPL8	G3WPL8	188	201	yes	yes	2;3	4.822e-16	176.23			2				1
LQEEMMQR	DLMCHCFRLQEEMMQR	LQEEMMQREEAETTLQ	R	L	Q	Q	R	E	0	1	0	0	0	2	2	0	0	0	1	0	2	0	0	0	0	0	0	0	0	8	0	1063.48	G3WPL8	G3WPL8	12	19	yes	yes	2	6.6584e-05	139.98			2				2
LQEEMMQREEAETTLQSFR	DLMCHCFRLQEEMMQR	ETTLQSFRQDVDNASL	R	L	Q	F	R	Q	1	2	0	0	0	3	5	0	0	0	2	0	2	1	0	1	2	0	0	0	0	19	1	2355.08	G3WPL8	G3WPL8	12	30	yes	yes	3	8.3035e-07	135.69			1				1
MALDIEIATYR	YQDLLNVKMALDIEIA	DIEIATYRKLLEGEES	K	M	A	Y	R	K	2	1	0	1	0	0	1	0	0	2	1	0	1	0	0	0	1	0	1	0	0	11	0	1294.66	G3WPL8;G3VSD9	G3WPL8	214	224	yes	no	2	2.5043e-21	197.73	1		15	1	1		2
MALDIEIATYRK	YQDLLNVKMALDIEIA	IEIATYRKLLEGEESR	K	M	A	R	K	L	2	1	0	1	0	0	1	0	0	2	1	1	1	0	0	0	1	0	1	0	0	12	1	1422.75	G3WPL8;G3VSD9	G3WPL8	214	225	yes	no	2;3	0.0012863	96.171
NLQEAEEWYK	QYESVAAKNLQEAEEW	QEAEEWYKSKFADLSE	K	N	L	Y	K	S	1	0	1	0	0	1	3	0	0	0	1	1	0	0	0	0	0	1	1	0	0	10	0	1308.6	G3WPL8;G3VSD9	G3WPL8	106	115	yes	no	2	2.1821e-78	261.87	1		1				3
QDVDNASLAR	ETTLQSFRQDVDNASL	VDNASLARLDLERKVE	R	Q	D	A	R	L	2	1	1	2	0	1	0	0	0	0	1	0	0	0	0	1	0	0	0	1	0	10	0	1087.53	G3WPL8	G3WPL8	31	40	yes	yes	2	3.0872e-05	144.55			1				1
QMREMEENFAVEAANYQDTIGR	GTNESLERQMREMEEN	NYQDTIGRLQDEIQNM	R	Q	M	G	R	L	3	2	2	1	0	2	4	1	0	1	0	0	2	1	0	0	1	0	1	1	0	22	1	2601.16	G3WPL8	G3WPL8	166	187	yes	yes	3	5.5404e-07	115.74			1				1
QQYESVAAK	TAALRDVRQQYESVAA	QYESVAAKNLQEAEEW	R	Q	Q	A	K	N	2	0	0	0	0	2	1	0	0	0	0	1	0	0	0	1	0	0	1	1	0	9	0	1022.5	G3WPL8	G3WPL8	97	105	yes	yes	2	0.0054198	98.048							1
QVQSLTCEVDALK	QESNEYRRQVQSLTCE	TCEVDALKGTNESLER	R	Q	V	L	K	G	1	0	0	1	1	2	1	0	0	0	2	1	0	0	0	1	1	0	0	2	0	13	0	1489.74	G3WPL8	G3WPL8	145	157	yes	yes	2	3.1023e-42	228.17			1				1
QVQSLTCEVDALKGTNESLER	QESNEYRRQVQSLTCE	GTNESLERQMREMEEN	R	Q	V	E	R	Q	1	1	1	1	1	2	3	1	0	0	3	1	0	0	0	2	2	0	0	2	0	21	1	2376.16	G3WPL8	G3WPL8	145	165	yes	yes	3	0.00022729	78.674			1
VESLQEEIAFLK	ARLDLERKVESLQEEI	QEEIAFLKKLHEEEIQ	K	V	E	L	K	K	1	0	0	0	0	1	3	0	0	1	2	1	0	1	0	1	0	0	0	1	0	12	0	1404.75	G3WPL8	G3WPL8	47	58	yes	yes	2	1.6517e-54	244.73			1
LTMELTGDSMEVKPIMTRK	KKMIENEKLTMELTGD	VKPIMTRKLRRRPNDP	K	L	T	R	K	L	0	1	0	1	0	0	2	1	0	1	2	2	3	0	1	1	3	0	0	1	0	19	2	2179.11	G3WR44	G3WR44	119	137	yes	yes	2	0.022404	40.186				1
DASGPVPDLPEGITVAYTVPK	EISEEELKDASGPVPD	TVAYTVPKKVEDALPG	K	D	A	P	K	K	2	0	0	2	0	0	1	2	0	1	1	1	0	0	4	1	2	0	1	3	0	21	0	2125.09	G3WRR2	G3WRR2	360	380	yes	yes	2	3.5226e-05	90.442
ELEQELALER	EQLRQRVRELEQELAL	EQELALERSRRASGGK	R	E	L	E	R	S	1	1	0	0	0	1	4	0	0	0	3	0	0	0	0	0	0	0	0	0	0	10	0	1228.63	G3WRR2	G3WRR2	11	20	yes	yes	2	0.014794	79.23
ESVEDSGESLEELMAK	VEDALPGRESVEDSGE	SLEELMAKMKNM____	R	E	S	A	K	M	1	0	0	1	0	0	5	1	0	0	2	1	1	0	0	3	0	0	0	1	0	16	0	1751.78	G3WRR2	G3WRR2	390	405	yes	yes	2	9.2889e-12	162.7
KVEDALPGR	TVAYTVPKKVEDALPG	VEDALPGRESVEDSGE	K	K	V	G	R	E	1	1	0	1	0	0	1	1	0	0	1	1	0	0	1	0	0	0	0	1	0	9	1	983.54	G3WRR2	G3WRR2	381	389	yes	yes	2	0.026011	68.626
QEEEILHEDNDWGIELVSEISEEELK	PKQEVVERQEEEILHE	EISEEELKDASGPVPD	R	Q	E	L	K	D	0	0	1	2	0	1	9	1	1	3	3	1	0	0	0	2	0	1	0	1	0	26	0	3111.44	G3WRR2	G3WRR2	334	359	yes	yes	3	3.5946e-07	81.65
VQAAEHTLR	PHQAGLSKVQAAEHTL	QAAEHTLRNINPDVHF	K	V	Q	L	R	N	2	1	0	0	0	1	1	0	1	0	1	0	0	0	0	0	1	0	0	1	0	9	0	1023.55	G3WRR2	G3WRR2	131	139	yes	yes	2	0.0073079	93.667
QLFHPEQLISGKEDAANNYAR	EVRTSIYKQLFHPEQL	DAANNYARGHYTVGKE	K	Q	L	A	R	G	3	1	2	1	0	2	2	1	1	1	2	1	0	1	1	1	0	0	1	0	0	21	1	2400.18	G3WSM9	G3WSM9	85	105	yes	yes	3	0.032887	39.983							1
TLGGGDDSFNTFFSETGAGK	NGTMSSDRTLGGGDDS	FSETGAGKHVPRAVFV	R	T	L	G	K	H	1	0	1	2	0	0	1	5	0	0	1	1	0	3	0	2	3	0	0	0	0	20	0	2006.89	G3WSM9	G3WSM9	41	60	yes	yes	2;3	1.6618e-111	287.31			1				7	1
HGSTSDDSVLK	GRMPFPIKHGSTSDDS	TSDDSVLKGAAEICRQ	K	H	G	L	K	G	0	0	0	2	0	0	0	1	1	0	1	1	0	0	0	3	1	0	0	1	0	11	0	1144.54	G3WV76	G3WV76	127	137	yes	yes	2	0.0074784	84.821
LNFDDGSVLK	AVANNQDKLNFDDGSV	FDDGSVLKQFISETAK	K	L	N	L	K	Q	0	0	1	2	0	0	0	1	0	0	2	1	0	1	0	1	0	0	0	1	0	10	0	1106.56	G3WV76	G3WV76	48	57	yes	yes	2	3.4969e-05	133.42
LNLMQMKNKVK	LQRPLFKKLNLMQMKN	MQMKNKVKGYSGGEIS	K	L	N	V	K	G	0	0	2	0	0	1	0	0	0	0	2	3	2	0	0	0	0	0	0	1	0	11	2	1345.76	G3WX93	G3WX93	158	168	yes	yes	2	0.021704	51.436						1
LIDPQTQVTR	LVTCDCLKLIDPQTQV	DPQTQVTRLRFPLPNV	K	L	I	T	R	L	0	1	0	1	0	2	0	0	0	1	1	0	0	0	1	0	2	0	0	1	0	10	0	1169.64	G3WXK9;G3W7E7	G3WXK9	536	545	yes	no	2	0.032432	65.719
QIYLSENPEEIAAR	CTINNISKQIYLSENP	NPEEIAARVNQSALEA	K	Q	I	A	R	V	2	1	1	0	0	1	3	0	0	2	1	0	0	0	1	1	0	0	1	0	0	14	0	1631.82	G3WXK9	G3WXK9	359	372	yes	yes	2	0.020088	74.789
VNQSALEAVTPSPSFQQR	NPEEIAARVNQSALEA	PSPSFQQRHESLRPIP	R	V	N	Q	R	H	2	1	1	0	0	3	1	0	0	0	1	0	0	1	2	3	1	0	0	2	0	18	0	1957.99	G3WXK9	G3WXK9	373	390	yes	yes	2	0.0076978	73.057
GSYGDLGGPIITTQVTIPK	DYSYAGGRGSYGDLGG	TTQVTIPKDVSNSSIS	R	G	S	P	K	D	0	0	0	1	0	1	0	4	0	3	1	1	0	0	2	1	3	0	1	1	0	19	0	1916.03	G3WXL4;G3WXL3	G3WXL4	378	396	yes	no	2	1.7859e-09	154.49	1
IILDLISESPIK	DRVVECIKIILDLISE	LISESPIKGRAQPYDP	K	I	I	I	K	G	0	0	0	1	0	0	1	0	0	4	2	1	0	0	1	2	0	0	0	0	0	12	0	1339.8	G3WXL4;G3WXL3;G3VIT4	G3WXL4	208	219	yes	no	2	0.0079121	81.709			1
METEQPEETFPNTETNGEFGK	________________	ETNGEFGKRPAEDMEE	-	M	E	G	K	R	0	0	2	0	0	1	6	2	0	0	0	1	1	2	2	0	4	0	0	0	0	21	0	2414.02	G3WXL4;G3WXL3	G3WXL4	1	21	yes	no	3	0.0074786	48.376	1
NLPLPPPPPPR	GRGGSRARNLPLPPPP	LPPPPPPRGGDLMAYD	R	N	L	P	R	G	0	1	1	0	0	0	0	0	0	0	2	0	0	0	7	0	0	0	0	0	0	11	0	1193.69	G3WXL4;G3WXL3;G3VIT4	G3WXL4	306	316	yes	no	2	0.00041017	131.09	1
TDYNASVSVPDSSGPER	GKNIKALRTDYNASVS	PDSSGPERILSISADI	R	T	D	E	R	I	1	1	1	2	0	0	1	1	0	0	0	0	0	0	2	4	1	0	1	2	0	17	0	1779.79	G3WXL4;G3WXL3	G3WXL4	70	86	yes	no	2	0.0025387	99.092	1
ADLINNLGTIAK	DTGIGMTKADLINNLG	NNLGTIAKSGTKAFME	K	A	D	A	K	S	2	0	2	1	0	0	0	1	0	2	2	1	0	0	0	0	1	0	0	0	0	12	0	1241.7	G3WYP8;G3WYP7;G3W1D6	G3WYP8	96	107	no	no	2	4.5445e-15	177.16
GVVDSEDLPLNISR	PEYLNFIRGVVDSEDL	DLPLNISREMLQQSKI	R	G	V	S	R	E	0	1	1	2	0	0	1	1	0	1	2	0	0	0	1	2	0	0	0	2	0	14	0	1512.78	G3WYP8;G3WYP7;G3W1D6	G3WYP8	378	391	no	no	2	5.053e-11	161.04
NPDDISQEEYGEFYK	KTKPIWTRNPDDISQE	EEYGEFYKSLTNDWED	R	N	P	Y	K	S	0	0	1	2	0	1	3	1	0	1	0	1	0	1	1	1	0	0	2	0	0	15	0	1832.77	G3WYP8;G3WYP7	G3WYP8	291	305	yes	no	2	1.053e-05	140.77
YIDQEELNK	KTKKIKEKYIDQEELN	IDQEELNKTKPIWTRN	K	Y	I	N	K	T	0	0	1	1	0	1	2	0	0	1	1	1	0	0	0	0	0	0	1	0	0	9	0	1150.55	G3WYP8;G3WYP7;G3W1D6	G3WYP8	275	283	no	no	2	0.012715	82.831
IYCTQTLVEGDGPK	PTWENENKIYCTQTLV	LVEGDGPKTYWTRELA	K	I	Y	P	K	T	0	0	0	1	1	1	1	2	0	1	1	1	0	0	1	0	2	0	1	1	0	14	0	1579.76	G3WZD1	G3WZD1	71	84	yes	yes	2	3.974e-34	207.64
KVAVAAASKPHVEIR	________________	SKPHVEIRQDGDQFYI	R	K	V	I	R	Q	4	1	0	0	0	0	1	0	1	1	0	2	0	0	1	1	0	0	0	3	0	15	2	1574.93	G3WZD1	G3WZD1	8	22	yes	yes	3	0.014556	72.681
QDGDQFYIK	SKPHVEIRQDGDQFYI	DGDQFYIKTATTVRTT	R	Q	D	I	K	T	0	0	0	2	0	2	0	1	0	1	0	1	0	1	0	0	0	0	1	0	0	9	0	1112.51	G3WZD1	G3WZD1	23	31	yes	yes	2	3.1904e-05	142.98
SLPTWENENK	TVDGRKCRSLPTWENE	PTWENENKIYCTQTLV	R	S	L	N	K	I	0	0	2	0	0	0	2	0	0	0	1	1	0	0	1	1	1	1	0	0	0	10	0	1216.57	G3WZD1	G3WZD1	61	70	yes	yes	2	1.2036e-13	178.46
VAVAAASKPHVEIR	GVNAMLRKVAVAAASK	SKPHVEIRQDGDQFYI	K	V	A	I	R	Q	4	1	0	0	0	0	1	0	1	1	0	1	0	0	1	1	0	0	0	3	0	14	1	1446.83	G3WZD1	G3WZD1	9	22	yes	yes	2;3	7.2702e-26	201.08
VGEGFDEETVDGR	RTTEINFKVGEGFDEE	DEETVDGRKCRSLPTW	K	V	G	G	R	K	0	1	0	2	0	0	3	3	0	0	0	0	0	1	0	0	1	0	0	2	0	13	0	1408.61	G3WZD1	G3WZD1	45	57	yes	yes	2	7.4193e-54	231.52
VGEGFDEETVDGRK	RTTEINFKVGEGFDEE	EETVDGRKCRSLPTWE	K	V	G	R	K	C	0	1	0	2	0	0	3	3	0	0	0	1	0	1	0	0	1	0	0	2	0	14	1	1536.71	G3WZD1	G3WZD1	45	58	yes	yes	2	2.9857e-11	164.22
DMAIATGGTVFGEEGLTLNLEDIQPHDFGK	DNRKNQLKDMAIATGG	IQPHDFGKVGEVIVTK	K	D	M	G	K	V	2	0	1	3	0	1	3	5	1	2	3	1	1	2	1	0	3	0	0	1	0	30	0	3174.52	G3WZS7	G3WZS7	315	344	yes	yes	3	1.9007e-06	77.646	1
EIGNIISDAMK	TISANGDREIGNIISD	NIISDAMKKVGRKGVI	R	E	I	M	K	K	1	0	1	1	0	0	1	1	0	3	0	1	1	0	0	1	0	0	0	0	0	11	0	1189.6	G3WZS7	G3WZS7	181	191	yes	yes	2	0.00072781	126.71	1
GYISPYFINTAK	IEGMKFDRGYISPYFI	PYFINTAKGQKCEFQD	R	G	Y	A	K	G	1	0	1	0	0	0	0	1	0	2	0	1	0	1	1	1	1	0	2	0	0	12	0	1372.7	G3WZS7	G3WZS7	222	233	yes	yes	2	4.9634e-22	188.27	1
ILQSSSEIGYDAMLGDFVDMVEK	EGSLIVEKILQSSSEI	DFVDMVEKGIIDPTKV	K	I	L	E	K	G	1	0	0	3	0	1	2	2	0	2	2	1	2	1	0	3	0	0	1	2	0	23	0	2546.19	G3WZS7	G3WZS7	494	516	yes	yes	2	3.4626e-07	91.883	1
LVQDVANNTNEEAGDGTTTATVLAR	KYKNIGARLVQDVANN	TTATVLARSIAKEGFE	R	L	V	A	R	S	4	1	3	2	0	1	2	2	0	0	2	0	0	0	0	0	5	0	0	3	0	25	0	2559.24	G3WZS7	G3WZS7	97	121	yes	yes	3	1.7753e-12	139.25	1
NAGVEGSLIVEK	IPAVTIAKNAGVEGSL	EGSLIVEKILQSSSEI	K	N	A	E	K	I	1	0	1	0	0	0	2	2	0	1	1	1	0	0	0	1	0	0	0	2	0	12	0	1214.65	G3WZS7	G3WZS7	482	493	yes	yes	2	0.00019677	131.79	1
PVTTPEEIAQVATISANGDR	AELKKQSKPVTTPEEI	TISANGDREIGNIISD	K	P	V	D	R	E	3	1	1	1	0	1	2	1	0	2	0	0	0	0	2	1	3	0	0	2	0	20	0	2068.04	G3WZS7	G3WZS7	161	180	yes	yes	2	2.0825e-05	100.97	1
QSKPVTTPEEIAQVATISANGDR	AVIAELKKQSKPVTTP	TISANGDREIGNIISD	K	Q	S	D	R	E	3	1	1	1	0	2	2	1	0	2	0	1	0	0	2	2	3	0	0	2	0	23	1	2411.23	G3WZS7	G3WZS7	158	180	yes	yes	3	2.2086e-10	125.92	1
TLNDELEIIEGMK	VITVKDGKTLNDELEI	LEIIEGMKFDRGYISP	K	T	L	M	K	F	0	0	1	1	0	0	3	1	0	2	2	1	1	0	0	0	1	0	0	0	0	13	0	1503.75	G3WZS7	G3WZS7	206	218	yes	yes	2	2.1809e-67	246.31	1
TVIIEQSWGSPK	VTMGPKGRTVIIEQSW	EQSWGSPKVTKDGVTV	R	T	V	P	K	V	0	0	0	0	0	1	1	1	0	2	0	1	0	0	1	2	1	1	0	1	0	12	0	1343.71	G3WZS7	G3WZS7	61	72	yes	yes	2	1.7162e-53	232.78	1
VQEIIEQLEVTASDYEK	EKSQIEKRVQEIIEQL	VTASDYEKEKLNERLA	R	V	Q	E	K	E	1	0	0	1	0	2	4	0	0	2	1	1	0	0	0	1	1	0	1	2	0	17	0	1992.99	G3WZS7	G3WZS7	371	387	yes	yes	2	1.8129e-47	216.16	1
ATAAILTVQLDEELGGTPVQSR	ADSSQEERATAAILTV	GGTPVQSRVVQGKEPA	R	A	T	S	R	V	3	1	0	1	0	2	2	2	0	1	3	0	0	0	1	1	3	0	0	2	0	22	0	2268.2	G3X0B8	G3X0B8	499	520	yes	yes	2	0.036827	39.515
AVEVNPAASELNSNDAFVLK	SSSSGATRAVEVNPAA	SNDAFVLKTPSSAYLW	R	A	V	L	K	T	4	0	3	1	0	0	2	0	0	0	2	1	0	1	1	2	0	0	0	3	0	20	0	2087.05	G3X0B8	G3X0B8	573	592	yes	yes	2	2.8256e-94	264.69
EVQNYESSTFLGYFK	NGKAIQHREVQNYESS	STFLGYFKSGIKYKKG	R	E	V	F	K	S	0	0	1	0	0	1	2	1	0	0	1	1	0	2	0	2	1	0	2	1	0	15	0	1810.84	G3X0B8	G3X0B8	143	157	yes	yes	2	8.9908e-10	131.61
HVVPNEVVVQR	GGVASGFKHVVPNEVV	PNEVVVQRLFQVKGRR	K	H	V	Q	R	L	0	1	1	0	0	1	1	0	1	0	0	0	0	0	1	0	0	0	0	5	0	11	0	1274.71	G3X0B8;CON__Q3SX14	G3X0B8	173	183	yes	no	2	0.020278	68.786
QGQIIYNWQGADSSQEER	YNYRHAGRQGQIIYNW	ADSSQEERATAAILTV	R	Q	G	E	R	A	1	1	1	1	0	4	2	2	0	2	0	0	0	0	0	2	0	1	1	0	0	18	0	2107.96	G3X0B8	G3X0B8	481	498	yes	yes	2	0.00024584	122.16
QTQIQVLPDGGETPIFK	ISKMSYPKQTQIQVLP	GGETPIFKQFFKNWRD	K	Q	T	F	K	Q	0	0	0	1	0	3	1	2	0	2	1	1	0	1	2	0	2	0	0	1	0	17	0	1869.98	G3X0B8	G3X0B8	369	385	yes	yes	2	5.3972e-37	214.54
SGAQELLNVLQAR	EGASDTEKSGAQELLN	LLNVLQARSVQVAEGS	K	S	G	A	R	S	2	1	1	0	0	2	1	1	0	0	3	0	0	0	0	1	0	0	0	1	0	13	0	1397.76	G3X0B8	G3X0B8	611	623	yes	yes	2	0.0062448	104.41
SVQVAEGSEPDSFWEALGGR	LLNVLQARSVQVAEGS	FWEALGGRAAYRTSPR	R	S	V	G	R	A	2	1	0	1	0	1	3	3	0	0	1	0	0	1	1	3	0	1	0	2	0	20	0	2119.98	G3X0B8	G3X0B8	624	643	yes	yes	2	1.8681e-15	161.31
TPSSAYLWVGEGASDTEK	SNDAFVLKTPSSAYLW	EGASDTEKSGAQELLN	K	T	P	E	K	S	2	0	0	1	0	0	2	2	0	0	1	1	0	0	1	3	2	1	1	1	0	18	0	1896.87	G3X0B8	G3X0B8	593	610	yes	yes	2	7.5081e-19	179.74
VEQFDLVPVPK	EPGLQIWRVEQFDLVP	FDLVPVPKNLYGDFFT	R	V	E	P	K	N	0	0	0	1	0	1	1	0	0	0	1	1	0	1	2	0	0	0	0	3	0	11	0	1269.7	G3X0B8	G3X0B8	68	78	yes	yes	2	0.0025788	101.72
VHISEEGAEPEAMLK	NERNGRAKVHISEEGA	AEPEAMLKVLGPKPSL	K	V	H	L	K	V	2	0	0	0	0	0	4	1	1	1	1	1	1	0	1	1	0	0	0	1	0	15	0	1638.79	G3X0B8	G3X0B8	253	267	yes	yes	2	0.0031625	116.79
EIVHIQIGQCGNQIGAK	LGCRARMREIVHIQIG	CGNQIGAKFWEVIGEE	R	E	I	A	K	F	1	0	1	0	1	3	1	3	1	4	0	1	0	0	0	0	0	0	0	1	0	17	0	1863.96	CON__ENSEMBL:ENSBTAP00000025008	CON__ENSEMBL:ENSBTAP00000025008	89	105	yes	yes	2;3	2.2557e-36	209.53							1
MREIVHIQIGQCGNQIGAK	LILGCRARMREIVHIQ	CGNQIGAKFWEVIGEE	R	M	R	A	K	F	1	1	1	0	1	3	1	3	1	4	0	1	1	0	0	0	0	0	0	1	0	19	1	2151.1	CON__ENSEMBL:ENSBTAP00000025008	CON__ENSEMBL:ENSBTAP00000025008	87	105	yes	yes	3	0.00041531	85.576
IITHPNFNGNTLDNDIMLIK	EQFINAAKIITHPNFN	DNDIMLIKLSSPATLN	K	I	I	I	K	L	0	0	4	2	0	0	0	1	1	4	2	1	1	1	1	0	2	0	0	0	0	20	0	2282.17	CON__P00761	CON__P00761	78	97	yes	yes	2;3	0.0089867	54.668		2	1				1
LGEHNIDVLEGNEQFINAAK	YKSRIQVRLGEHNIDV	EQFINAAKIITHPNFN	R	L	G	A	K	I	2	0	3	1	0	1	3	2	1	2	2	1	0	1	0	0	0	0	0	1	0	20	0	2210.1	CON__P00761	CON__P00761	58	77	yes	yes	2;3	3.0172e-112	290.18	2	2	2	4	2	2	2	2
LSSPATLNSR	DNDIMLIKLSSPATLN	SPATLNSRVATVSLPR	K	L	S	S	R	V	1	1	1	0	0	0	0	0	0	0	2	0	0	0	1	3	1	0	0	0	0	10	0	1044.56	CON__P00761	CON__P00761	98	107	yes	yes	2	1.1527e-08	163.84		1	1		1		1	1
SCAAAGTECLISGWGNTK	VATVSLPRSCAAAGTE	ISGWGNTKSSGSSYPS	R	S	C	T	K	S	3	0	1	0	2	0	1	3	0	1	1	1	0	0	0	2	2	1	0	0	0	18	0	1881.83	CON__P00761	CON__P00761	116	133	yes	yes	2	4.0875e-48	225.01						1
DAEEWFFTK	KMAEKNRKDAEEWFFT	AEEWFFTKTEELNREV	K	D	A	T	K	T	1	0	0	1	0	0	2	0	0	0	0	1	0	2	0	0	1	1	0	0	0	9	0	1171.52	CON__P02533;CON__Q6IFX2	CON__P02533	301	309	yes	no	2	0.0014386	112.3
EVATNSELVQSGK	TKTEELNREVATNSEL	SELVQSGKSEISELRR	R	E	V	G	K	S	1	0	1	0	0	1	2	1	0	0	1	1	0	0	0	2	1	0	0	2	0	13	0	1360.68	CON__P02533	CON__P02533	316	328	no	no	2	1.4788e-22	191.48
AEFAEVSKLVTDLTK	RLSQRFPKAEFAEVSK	KLVTDLTKVHTECCHG	K	A	E	T	K	V	2	0	0	1	0	0	2	0	0	0	2	2	0	1	0	1	2	0	0	2	0	15	1	1649.89	CON__P02768-1	CON__P02768-1	250	264	yes	yes	2;3	9.5958e-17	182.7				2	1		2	2
AFKAWAVAR	SLQKFGERAFKAWAVA	FKAWAVARLSQRFPKA	R	A	F	A	R	L	4	1	0	0	0	0	0	0	0	0	0	1	0	1	0	0	0	1	0	1	0	9	1	1018.57	CON__P02768-1	CON__P02768-1	234	242	yes	yes	2	0.006604	128.38					1
KVPQVSTPTLVEVSR	ALLVRYTKKVPQVSTP	PTLVEVSRNLGKVGSK	K	K	V	S	R	N	0	1	0	0	0	1	1	0	0	0	1	1	0	0	2	2	2	0	0	4	0	15	1	1638.93	CON__P02768-1;CON__P02769	CON__P02768-1	438	452	no	no	2	3.5745e-07	146.84		1	1	1	2	1	1	1
KVPQVSTPTLVEVSRNLGK	ALLVRYTKKVPQVSTP	EVSRNLGKVGSKCCKH	K	K	V	G	K	V	0	1	1	0	0	1	1	1	0	0	2	2	0	0	2	2	2	0	0	4	0	19	2	2051.17	CON__P02768-1	CON__P02768-1	438	456	yes	yes	3	0.016278	51.495					1
MaxQa	CFAEEGKKLVAASQAA	ASQAALGL________	K	L	V	G	L	-	4	0	0	0	0	1	0	1	0	0	3	0	0	0	0	1	0	0	0	1	0	11	0	1012.59	CON__P02768-1	CON__P02768-1	599	609	yes	yes	2	1.3599e-05	143.5	1	1	1	1	2	1	1	1
QNCELFEQLGEYKFQNALLVR	EEPQNLIKQNCELFEQ	FQNALLVRYTKKVPQV	K	Q	N	V	R	Y	1	1	2	0	1	3	3	1	0	0	4	1	0	2	0	0	0	0	1	1	0	21	1	2598.29	CON__P02768-1	CON__P02768-1	414	434	yes	yes	3	2.8838e-05	85.176					1	1	2	1
VFDEFKPLVEEPQNLIK	DPHECYAKVFDEFKPL	EEPQNLIKQNCELFEQ	K	V	F	I	K	Q	0	0	1	1	0	1	3	0	0	1	2	2	0	2	2	0	0	0	0	2	0	17	1	2044.09	CON__P02768-1	CON__P02768-1	397	413	yes	yes	3	0.02906	51.771
VPQVSTPTLVEVSR	LLVRYTKKVPQVSTPT	PTLVEVSRNLGKVGSK	K	V	P	S	R	N	0	1	0	0	0	1	1	0	0	0	1	0	0	0	2	2	2	0	0	4	0	14	0	1510.84	CON__P02768-1;CON__P02769	CON__P02768-1	439	452	no	no	2	0.0099023	94.781				1	1
YTKKVPQVSTPTLVEVSR	FQNALLVRYTKKVPQV	PTLVEVSRNLGKVGSK	R	Y	T	S	R	N	0	1	0	0	0	1	1	0	0	0	1	2	0	0	2	2	3	0	1	4	0	18	2	2031.14	CON__P02768-1	CON__P02768-1	435	452	yes	yes	2;3;4	0.00067865	110.56			1				1	2
DAFLGSFLYEYSR	CKNYQEAKDAFLGSFL	SFLYEYSRRHPEYAVS	K	D	A	S	R	R	1	1	0	1	0	0	1	1	0	0	2	0	0	2	0	2	0	0	2	0	0	13	0	1566.74	CON__P02769	CON__P02769	347	359	yes	yes	2	0.0090633	89.189					2
RHPEYAVSVLLR	SFLYEYSRRHPEYAVS	YAVSVLLRLAKEYEAT	R	R	H	L	R	L	1	2	0	0	0	0	1	0	1	0	2	0	0	0	1	1	0	0	1	2	0	12	1	1438.8	CON__P02769	CON__P02769	360	371	yes	yes	3	0.0057105	82.705	3		1		1	1		1
AEAESLYQSK	EDIAQKSKAEAESLYQ	AESLYQSKYEELQITA	K	A	E	S	K	Y	2	0	0	0	0	1	2	0	0	0	1	1	0	0	0	2	0	0	1	0	0	10	0	1124.54	CON__P04264	CON__P04264	367	376	yes	yes	2	0.00067137	133.42
FLEQQNQVLQTK	ASFIDKVRFLEQQNQV	QNQVLQTKWELLQQVD	R	F	L	T	K	W	0	0	1	0	0	4	1	0	0	0	2	1	0	1	0	0	1	0	0	1	0	12	0	1474.78	CON__Q6IFZ6;CON__Q7Z794;CON__Q9R0H5;CON__Q6NXH9;CON__P35908;G3VF31;G3VF30;CON__P04264	CON__P04264	200	211	no	no	2	2.356e-81	262.15		1			1	1	1	2
IEISELNR	GDSVRNSKIEISELNR	IEISELNRVIQRLRSE	K	I	E	N	R	V	0	1	1	0	0	0	2	0	0	2	1	0	0	0	0	1	0	0	0	0	0	8	0	972.524	CON__P35908;G3VF31;G3VF30;CON__P04264	CON__P04264	396	403	no	no	2	0.0030415	108.74
LALDLEIATYR	YQELMNTKLALDLEIA	DLEIATYRTLLEGEES	K	L	A	Y	R	T	2	1	0	1	0	0	1	0	0	1	3	0	0	0	0	0	1	0	1	0	0	11	0	1276.7	CON__P04264	CON__P04264	473	483	no	no	2	0.031179	63.091
NMQDMVEDYR	SRLDSELKNMQDMVED	QDMVEDYRNKYEDEIN	K	N	M	Y	R	N	0	1	1	2	0	1	1	0	0	0	0	0	2	0	0	0	0	0	1	1	0	10	0	1299.52	CON__P04264	CON__P04264	258	267	yes	yes	2	0.006744	88.596
QISNLQQSISDAEQR	SEIDNVKKQISNLQQS	SISDAEQRGENALKDA	K	Q	I	Q	R	G	1	1	1	1	0	4	1	0	0	2	1	0	0	0	0	3	0	0	0	0	0	15	0	1715.84	CON__P04264	CON__P04264	418	432	yes	yes	2	1.87e-25	197.73
SGGGFSSGSAGIINYQR	FSSRSGYRSGGGFSSG	AGIINYQRRTTSSSTR	R	S	G	Q	R	R	1	1	1	0	0	1	0	5	0	2	0	0	0	1	0	4	0	0	1	0	0	17	0	1656.79	CON__P04264	CON__P04264	13	29	yes	yes	2	2.7871e-05	133.87
SKAEAESLYQSK	QNEDIAQKSKAEAESL	AESLYQSKYEELQITA	K	S	K	S	K	Y	2	0	0	0	0	1	2	0	0	0	1	2	0	0	0	3	0	0	1	0	0	12	1	1339.66	CON__P04264	CON__P04264	365	376	yes	yes	2	0.011525	116.51
SLDLDSIIAEVK	ILSMDNNRSLDLDSII	DSIIAEVKAQNEDIAQ	R	S	L	V	K	A	1	0	0	2	0	0	1	0	0	2	2	1	0	0	0	2	0	0	0	1	0	12	0	1301.71	CON__P04264	CON__P04264	344	355	no	no	2	5.7776e-42	228.93		1		1	1	1	1	1
SLNNQFASFIDK	SREREQIKSLNNQFAS	QFASFIDKVRFLEQQN	K	S	L	D	K	V	1	0	2	1	0	1	0	0	0	1	1	1	0	2	0	2	0	0	0	0	0	12	0	1382.68	CON__P04264	CON__P04264	186	197	no	no	2	1.262e-41	226.42		1				1	1	1
TLLEGEESR	DLEIATYRTLLEGEES	LLEGEESRMSGECAPN	R	T	L	S	R	M	0	1	0	0	0	0	3	1	0	0	2	0	0	0	0	1	1	0	0	0	0	9	0	1032.51	CON__P04264	CON__P04264	484	492	no	no	2	0.0011133	122.28
TNAENEFVTIK	YEDEINKRTNAENEFV	ENEFVTIKKDVDGAYM	R	T	N	I	K	K	1	0	2	0	0	0	2	0	0	1	0	1	0	1	0	0	2	0	0	1	0	11	0	1264.63	CON__P04264	CON__P04264	278	288	yes	yes	2	0.00027754	134.56
TNAENEFVTIKK	YEDEINKRTNAENEFV	NEFVTIKKDVDGAYMT	R	T	N	K	K	D	1	0	2	0	0	0	2	0	0	1	0	2	0	1	0	0	2	0	0	1	0	12	1	1392.72	CON__P04264	CON__P04264	278	289	yes	yes	2	0.0032328	101.38
WELLQQVDTSTR	QNQVLQTKWELLQQVD	QQVDTSTRTHNLEPYF	K	W	E	T	R	T	0	1	0	1	0	2	1	0	0	0	2	0	0	0	0	1	2	1	0	1	0	12	0	1474.74	CON__P04264	CON__P04264	212	223	yes	yes	2	1.262e-41	226.42						1	1	1
YEELQITAGR	AESLYQSKYEELQITA	ELQITAGRHGDSVRNS	K	Y	E	G	R	H	1	1	0	0	0	1	2	1	0	1	1	0	0	0	0	0	1	0	1	0	0	10	0	1178.59	CON__P04264	CON__P04264	377	386	yes	yes	2	6.4657e-09	167.11							1	1
ALEEANADLEVK	ASYLDKVRALEEANAD	ANADLEVKIRDWYQRQ	R	A	L	V	K	I	3	0	1	1	0	0	3	0	0	0	2	1	0	0	0	0	0	0	0	1	0	12	0	1300.65	CON__P08779;CON__P19012;CON__ENSEMBL:ENSP00000377550;G3VN74;CON__P13646-1;CON__P02533;CON__Q6IFX2	CON__P08779	137	148	no	no	2	0.011017	78.287
APSTYGGGLSVSSR	VLAGGSCRAPSTYGGG	GGLSVSSRFSSGGACG	R	A	P	S	R	F	1	1	0	0	0	0	0	3	0	0	1	0	0	0	1	4	1	0	1	1	0	14	0	1337.66	CON__P08779	CON__P08779	42	55	yes	yes	2	0.010139	87.447
ASLENSLEETK	LQSQLSMKASLENSLE	ENSLEETKGRYCMQLS	K	A	S	T	K	G	1	0	1	0	0	0	3	0	0	0	2	1	0	0	0	2	1	0	0	0	0	11	0	1219.59	CON__P08779;CON__Q9Z2K1;CON__Q3ZAW8;G3VZP3;CON__P02533	CON__P08779	355	365	no	no	2	0.0028871	99.752
DAETWFLSK	QMAEKNRRDAETWFLS	AETWFLSKTEELNKEV	R	D	A	S	K	T	1	0	0	1	0	0	1	0	0	0	1	1	0	1	0	1	1	1	0	0	0	9	0	1095.52	CON__P08779	CON__P08779	303	311	yes	yes	2	0.0014386	112.3
EVASNSELVQSSR	SKTEELNKEVASNSEL	SELVQSSRSEVTELRR	K	E	V	S	R	S	1	1	1	0	0	1	2	0	0	0	1	0	0	0	0	4	0	0	0	2	0	13	0	1404.68	CON__P08779	CON__P08779	318	330	yes	yes	2	0.0085987	93.716
GQTGGDVNVEMDAAPGVDLSR	EEEMLALRGQTGGDVN	APGVDLSRILNEMRDQ	R	G	Q	S	R	I	2	1	1	3	0	1	1	4	0	0	1	0	1	0	1	1	1	0	0	3	0	21	0	2086.96	CON__P08779;CON__Q9Z2K1;CON__Q3ZAW8	CON__P08779	264	284	yes	no	2	3.0452e-05	92.034
IIAATIENAQPILQIDNAR	TIEDLRNKIIAATIEN	ILQIDNARLAADDFRT	K	I	I	A	R	L	4	1	2	1	0	2	1	0	0	5	1	0	0	0	1	0	1	0	0	0	0	19	0	2063.14	CON__P08779	CON__P08779	178	196	yes	yes	2;3	0.0035139	71.592
VLDELTLAR	ADVNGLRRVLDELTLA	LDELTLARTDLEMQIE	R	V	L	A	R	T	1	1	0	1	0	0	1	0	0	0	3	0	0	0	0	0	1	0	0	1	0	9	0	1028.59	CON__P08779;G3VZP3;CON__P19012;CON__A2A4G1;G3VYT0;CON__P08727;G3VKB3;CON__P19001;G3VXC8;G3VZV1;CON__P02533;CON__Q6IFX2	CON__P08779	226	234	no	no	2	0.028062	70.399
ADLEMQIESLTEELAYLK	LDELTLTKADLEMQIE	TEELAYLKKNHEEEMK	K	A	D	L	K	K	2	0	0	1	0	1	4	0	0	1	4	1	1	0	0	1	1	0	1	0	0	18	0	2095.04	CON__P13645	CON__P13645	267	284	yes	yes	2;3	0.0016507	101.28
ADLEMQIESLTEELAYLKK	LDELTLTKADLEMQIE	EELAYLKKNHEEEMKD	K	A	D	K	K	N	2	0	0	1	0	1	4	0	0	1	4	2	1	0	0	1	1	0	1	0	0	19	1	2223.13	CON__P13645	CON__P13645	267	285	yes	yes	3	0.028453	46.324
AETECQNTEYQQLLDIK	EEQLQQIRAETECQNT	YQQLLDIKIRLENEIQ	R	A	E	I	K	I	1	0	1	1	1	3	3	0	0	1	2	1	0	0	0	0	2	0	1	0	0	17	0	2081.96	CON__P13645	CON__P13645	423	439	yes	yes	2	3.3259e-05	132.4
ALEESNYELEGK	ASYLDKVRALEESNYE	SNYELEGKIKEWYEKH	R	A	L	G	K	I	1	0	1	0	0	0	4	1	0	0	2	1	0	0	0	1	0	0	1	0	0	12	0	1380.64	CON__P13645;CON__P02535-1	CON__P13645	166	177	yes	no	2	4.2191e-31	210.79							1	1
DAEAWFNEK	QLAEQNRKDAEAWFNE	AEAWFNEKSKELTTEI	K	D	A	E	K	S	2	0	1	1	0	0	2	0	0	0	0	1	0	1	0	0	0	1	0	0	0	9	0	1108.48	CON__P13645;G3VGH6;G3W3P8;G3W481;CON__Q7Z3Z0;CON__Q7Z3Y8;G3W3C8;CON__Q148H6;G3W3P7;CON__Q7Z3Y7;G3W1R6;G3W1R7	CON__P13645	335	343	yes	no	2	5.719e-06	153.97							1	1
ELTTEIDNNIEQISSYK	AWFNEKSKELTTEIDN	IEQISSYKSEITELRR	K	E	L	Y	K	S	0	0	2	1	0	1	3	0	0	3	1	1	0	0	0	2	2	0	1	0	0	17	0	1995.96	CON__P13645	CON__P13645	346	362	yes	yes	2	0.00010112	125.96								1
GSLGGGFSSGGFSGGSFSR	SLRISSSKGSLGGGFS	FSGGSFSRGSSGGGCF	K	G	S	S	R	G	0	1	0	0	0	0	0	8	0	0	1	0	0	3	0	6	0	0	0	0	0	19	0	1706.76	CON__P13645	CON__P13645	41	59	yes	yes	2	4.2088e-13	159.18		1		1			1	1
LENEIQTYR	QLLDIKIRLENEIQTY	ENEIQTYRSLLEGEGS	R	L	E	Y	R	S	0	1	1	0	0	1	2	0	0	1	1	0	0	0	0	0	1	0	1	0	0	9	0	1164.58	CON__P13645;CON__P02535-1;G3W2T7;G3W2T6;G3W1R6;G3W1R7	CON__P13645	442	450	yes	no	2	0.0067962	94.692								1
NVSTGDVNVEMNAAPGVDLTQLLNNMR	EEEMKDLRNVSTGDVN	TQLLNNMRSQYEQLAE	R	N	V	M	R	S	2	1	5	2	0	1	1	2	0	0	3	0	2	0	1	1	2	0	0	4	0	27	0	2871.39	CON__P13645;CON__P02535-1	CON__P13645	296	322	yes	yes	3	0.00061377	61.612
SEITELRR	IEQISSYKSEITELRR	SEITELRRNVQALEIE	K	S	E	R	R	N	0	2	0	0	0	0	2	0	0	1	1	0	0	0	0	1	1	0	0	0	0	8	1	1002.55	CON__P13645;CON__P02535-1	CON__P13645	363	370	yes	no	2	0.025155	69.198
SLLEGEGSSGGGGR	ENEIQTYRSLLEGEGS	GSSGGGGRGGGSFGGG	R	S	L	G	R	G	0	1	0	0	0	0	2	6	0	0	2	0	0	0	0	3	0	0	0	0	0	14	0	1261.59	CON__P13645	CON__P13645	451	464	yes	yes	2	0.0098586	96.135
SQYEQLAEQNR	TQLLNNMRSQYEQLAE	EQLAEQNRKDAEAWFN	R	S	Q	N	R	K	1	1	1	0	0	3	2	0	0	0	1	0	0	0	0	1	0	0	1	0	0	11	0	1364.63	CON__P13645	CON__P13645	323	333	yes	yes	2	3.4564e-29	202.18							1	2
SQYEQLAEQNRK	TQLLNNMRSQYEQLAE	QLAEQNRKDAEAWFNE	R	S	Q	R	K	D	1	1	1	0	0	3	2	0	0	0	1	1	0	0	0	1	0	0	1	0	0	12	1	1492.73	CON__P13645	CON__P13645	323	334	yes	yes	2	0.0054101	88.803
VLDELTLTK	ADINGLRRVLDELTLT	LDELTLTKADLEMQIE	R	V	L	T	K	A	0	0	0	1	0	0	1	0	0	0	3	1	0	0	0	0	2	0	0	1	0	9	0	1030.59	CON__P13645	CON__P13645	258	266	yes	yes	2	0.0011387	121.5								1
VTMQNLNDR	GLLSGNEKVTMQNLND	TMQNLNDRLASYLDKV	K	V	T	D	R	L	0	1	2	1	0	1	0	0	0	0	1	0	1	0	0	0	1	0	0	1	0	9	0	1089.52	CON__P13645;CON__P02535-1;G3VGH6;G3W3P8;G3W481;CON__Q7Z3Z0;CON__Q7Z3Y8;G3W3C8;CON__Q148H6;G3W3P7;G3W2T7;CON__Q7Z3Y7;G3W2T6;G3VLK2;CON__Q7Z3Y9;G3VDX7;CON__P08779;CON__Q9Z2K1;CON__Q3ZAW8;G3VZP3;CON__A2A4G1;G3VYT0;CON__P02533	CON__P13645	148	156	no	no	2	0.0002354	138.25								2
YENEVALR	AADDFRLKYENEVALR	YENEVALRQSVEADIN	K	Y	E	L	R	Q	1	1	1	0	0	0	2	0	0	0	1	0	0	0	0	0	0	0	1	1	0	8	0	992.493	CON__P13645	CON__P13645	238	245	yes	yes	2	0.035925	65.224
LSISETYDLK	SANLHLPKLSISETYD	ISETYDLKSVLGDVGI	K	L	S	L	K	S	0	0	0	1	0	0	1	0	0	1	2	1	0	0	0	2	1	0	1	0	0	10	0	1167.6	CON__P34955	CON__P34955	313	322	yes	yes	2	0.015871	78.342							1
SVLGDVGITEVFSDR	ISETYDLKSVLGDVGI	ITEVFSDRADLSGITK	K	S	V	D	R	A	0	1	0	2	0	0	1	2	0	1	1	0	0	1	0	2	1	0	0	3	0	15	0	1592.8	CON__P34955	CON__P34955	323	337	yes	yes	2	0.0032405	113.67							1
DIENQYETQITQIEHEVSSSGQEVQSSAK	QLIAKNRKDIENQYET	QEVQSSAKEVTQLRHG	K	D	I	A	K	E	1	0	1	1	0	5	5	1	1	3	0	1	0	0	0	5	2	0	1	2	0	29	0	3263.51	CON__P35527	CON__P35527	340	368	yes	yes	3	2.7024e-17	138.57
EIETYHNLLEGGQEDFESSGAGK	SIKMRLEKEIETYHNL	FESSGAGKIGLGGRGG	K	E	I	G	K	I	1	0	1	1	0	1	5	4	1	1	2	1	0	1	0	2	1	0	1	0	0	23	0	2509.12	CON__P35527	CON__P35527	450	472	yes	yes	3	0.0057681	52.464
FSSSSGYGGGSSR	GGRGGGGRFSSSSGYG	GYGGGSSRVCGRGGGG	R	F	S	S	R	V	0	1	0	0	0	0	0	4	0	0	0	0	0	1	0	6	0	0	1	0	0	13	0	1234.52	CON__P35527	CON__P35527	47	59	yes	yes	2	0.0093129	86.756							1
GGGGSFGYSYGGGSGGGFSASSLGGGFGGGSR	GSSRVCGRGGGGSFGY	GGFGGGSRGFGGASGG	R	G	G	S	R	G	1	1	0	0	0	0	0	17	0	0	1	0	0	3	0	7	0	0	2	0	0	32	0	2704.15	CON__P35527	CON__P35527	64	95	yes	yes	3	1.2391e-09	84.878			1
GGSGGSYGGGGSGGGYGGGSGSR	GSYGRGSRGGSGGSYG	YGGGSGSRGGSGGSYG	R	G	G	S	R	G	0	1	0	0	0	0	0	15	0	0	0	0	0	0	0	5	0	0	2	0	0	23	0	1790.72	CON__P35527	CON__P35527	491	513	yes	yes	2	0.012567	53.964							1
LASYLDKVQALEEANNDLENK	TMQELNSRLASYLDKV	ANNDLENKIQDWYDKK	R	L	A	N	K	I	3	0	3	2	0	1	3	0	0	0	4	2	0	0	0	1	0	0	1	1	0	21	1	2376.18	CON__P35527	CON__P35527	164	184	yes	yes	3	0.037149	38.578
QEYEQLIAK	TKTLNDMRQEYEQLIA	EYEQLIAKNRKDIENQ	R	Q	E	A	K	N	1	0	0	0	0	2	2	0	0	1	1	1	0	0	0	0	0	0	1	0	0	9	0	1120.58	CON__P35527	CON__P35527	328	336	yes	yes	2	0.0049017	99.815
QGVDADINGLR	FEMEQNLRQGVDADIN	DADINGLRQVLDNLTM	R	Q	G	L	R	Q	1	1	1	2	0	1	0	2	0	1	1	0	0	0	0	0	0	0	0	1	0	11	0	1156.58	CON__P35527	CON__P35527	251	261	yes	yes	2	0.0020085	105.36
QVLDNLTMEK	DADINGLRQVLDNLTM	LDNLTMEKSDLEMQYE	R	Q	V	E	K	S	0	0	1	1	0	1	1	0	0	0	2	1	1	0	0	0	1	0	0	1	0	10	0	1189.6	CON__P35527	CON__P35527	262	271	yes	yes	2	0.023165	75.566
SGGGGGGGLGSGGSIR	FSSSYLSRSGGGGGGG	LGSGGSIRSSYSRFSS	R	S	G	I	R	S	0	1	0	0	0	0	0	10	0	1	1	0	0	0	0	3	0	0	0	0	0	16	0	1231.59	CON__P35527	CON__P35527	14	29	yes	yes	2	0.0058756	81.526							1
STMQELNSR	GILTANEKSTMQELNS	TMQELNSRLASYLDKV	K	S	T	S	R	L	0	1	1	0	0	1	1	0	0	0	1	0	1	0	0	2	1	0	0	0	0	9	0	1064.49	CON__P35527	CON__P35527	155	163	yes	yes	2	3.4457e-05	141.91
TLLDIDNTR	DLTVGNNKTLLDIDNT	LLDIDNTRMTLDDFRI	K	T	L	T	R	M	0	1	1	2	0	0	0	0	0	1	2	0	0	0	0	0	2	0	0	0	0	9	0	1059.56	CON__P35527	CON__P35527	225	233	yes	yes	2	0.00065926	131.52
VQALEEANNDLENK	RLASYLDKVQALEEAN	ANNDLENKIQDWYDKK	K	V	Q	N	K	I	2	0	3	1	0	1	3	0	0	0	2	1	0	0	0	0	0	0	0	1	0	14	0	1585.76	CON__P35527	CON__P35527	171	184	yes	yes	2	3.0131e-58	244								1
AQYEEIAQR	DSIIAEVKAQYEEIAQ	QYEEIAQRSKEEAEAL	K	A	Q	Q	R	S	2	1	0	0	0	2	2	0	0	1	0	0	0	0	0	0	0	0	1	0	0	9	0	1106.54	CON__P35908;CON__P19013;CON__P48668;CON__P04259;G3WQ04	CON__P35908	360	368	no	no	2	0.00097953	126.39
GFSSGSAVVSGGSR	GGGGGGFRGFSSGSAV	AVVSGGSRRSTSSFSC	R	G	F	S	R	R	1	1	0	0	0	0	0	4	0	0	0	0	0	1	0	5	0	0	0	2	0	14	0	1253.6	CON__P35908;CON__Q3TTY5	CON__P35908	21	34	yes	no	2	0.00035385	126.71								2
GSSSGGGYSSGSSSYGSGGR	AFGGSGGRGSSSGGGY	SSYGSGGRQSGSRGGS	R	G	S	G	R	Q	0	1	0	0	0	0	0	8	0	0	0	0	0	0	0	9	0	0	2	0	0	20	0	1739.7	CON__P35908	CON__P35908	531	550	yes	yes	2	0.03066	47.499
LALDVEIATYR	YQELMNVKLALDVEIA	DVEIATYRKLLEGEEC	K	L	A	Y	R	K	2	1	0	1	0	0	1	0	0	1	2	0	0	0	0	0	1	0	1	1	0	11	0	1262.69	CON__P35908;CON__Q5XKE5;CON__REFSEQ:XP_932229;G3VQB4;CON__P07744;CON__P12035;CON__Q01546;CON__P48668;CON__P04259;CON__O95678;CON__P13647	CON__P35908	477	487	no	no	2	0.038233	60.255
LNDLEEALQQAK	ALKDARNKLNDLEEAL	EEALQQAKEDLARLLR	K	L	N	A	K	E	2	0	1	1	0	2	2	0	0	0	3	1	0	0	0	0	0	0	0	0	0	12	0	1370.7	CON__P35908	CON__P35908	448	459	yes	yes	2	0.031613	62.732								1
NLDLDSIIAEVK	ILSMDNSRNLDLDSII	DSIIAEVKAQYEEIAQ	R	N	L	V	K	A	1	0	1	2	0	0	1	0	0	2	2	1	0	0	0	1	0	0	0	1	0	12	0	1328.72	CON__P35908;CON__Q5XKE5;CON__P48668;CON__P04259;CON__O95678;CON__P13647;CON__Q8VED5	CON__P35908	348	359	no	no	2	3.3692e-54	243.4		1		1		1	1	1
TAAENDFVTLK	YEDEINKRTAAENDFV	ENDFVTLKKDVDNAYM	R	T	A	L	K	K	2	0	1	1	0	0	1	0	0	0	1	1	0	1	0	0	2	0	0	1	0	11	0	1207.61	CON__P35908	CON__P35908	282	292	yes	yes	2	0.0063652	88.021								1
TAAENDFVTLKK	YEDEINKRTAAENDFV	NDFVTLKKDVDNAYMI	R	T	A	K	K	D	2	0	1	1	0	0	1	0	0	0	1	2	0	1	0	0	2	0	0	1	0	12	1	1335.7	CON__P35908	CON__P35908	282	293	yes	yes	2	0.035528	58.781								1
TSQNSELNNMQDLVEDYKK	LDGLTAERTSQNSELN	DLVEDYKKKYEDEINK	R	T	S	K	K	K	0	0	3	2	0	2	2	0	0	0	2	2	1	0	0	2	1	0	1	1	0	19	1	2255.04	CON__P35908	CON__P35908	254	272	yes	yes	3	0.011272	57.595								1
VDLLNQEIEFLK	IKVELQSKVDLLNQEI	NQEIEFLKVLYDAEIS	K	V	D	L	K	V	0	0	1	1	0	1	2	0	0	1	3	1	0	1	0	0	0	0	0	1	0	12	0	1459.79	CON__P35908	CON__P35908	309	320	yes	yes	2	1.509e-06	150.14								1
YEELQVTVGR	AEALYHSKYEELQVTV	ELQVTVGRHGDSLKEI	K	Y	E	G	R	H	0	1	0	0	0	1	2	1	0	0	1	0	0	0	0	0	1	0	1	2	0	10	0	1192.61	CON__P35908	CON__P35908	381	390	yes	yes	2	0.0010328	128.85								1
ADTLTDEINFLR	NKVELQAKADTLTDEI	TDEINFLRALYDAELS	K	A	D	L	R	A	1	1	1	2	0	0	1	0	0	1	2	0	0	1	0	0	2	0	0	0	0	12	0	1406.7	CON__P48668;CON__P04259	CON__P48668	288	299	no	no	2	4.1607e-22	190.36
AEAESWYQTK	EEIAQRSRAEAESWYQ	AESWYQTKYEELQVTA	R	A	E	T	K	Y	2	0	0	0	0	1	2	0	0	0	0	1	0	0	0	1	1	1	1	0	0	10	0	1211.55	CON__P48668;CON__P04259;CON__O95678;G3WQ04;CON__Q8VED5	CON__P48668	350	359	no	no	2	0.021189	73.951
ALYDAELSQMQTHISDTSVVLSMDNNR	TDEINFLRALYDAELS	VLSMDNNRNLDLDSII	R	A	L	N	R	N	2	1	2	3	0	2	1	0	1	1	3	0	2	0	0	4	2	0	1	2	0	27	0	3037.41	CON__P48668;CON__P04259	CON__P48668	300	326	no	no	3	0.0042511	50.783
DVDAAYMNK	NEFVTLKKDVDAAYMN	VDAAYMNKVELQAKAD	K	D	V	N	K	V	2	0	1	2	0	0	0	0	0	0	0	1	1	0	0	0	0	0	1	1	0	9	0	1025.45	CON__P48668;CON__P04259;CON__O95678;CON__P13647;G3WQ04	CON__P48668	273	281	no	no	2	0.020634	76.064
QNLEPLFEQYINNLR	EQGTKTVRQNLEPLFE	EQYINNLRRQLDSIVG	R	Q	N	L	R	R	0	1	3	0	0	2	2	0	0	1	3	0	0	1	1	0	0	0	1	0	0	15	0	1889.96	CON__P48668;CON__P04259;CON__P13647	CON__P48668	208	222	no	no	3	0.0392	44.436
SGFSSISVSR	ARLPGVSRSGFSSISV	FSSISVSRSRGSGGLG	R	S	G	S	R	S	0	1	0	0	0	0	0	1	0	1	0	0	0	1	0	5	0	0	0	1	0	10	0	1025.51	CON__P48668;CON__P04259	CON__P48668	31	40	yes	no	2	0.024021	74.962
WTLLQEQGTK	QNKVLDTKWTLLQEQG	LLQEQGTKTVRQNLEP	K	W	T	T	K	T	0	0	0	0	0	2	1	1	0	0	2	1	0	0	0	0	2	1	0	0	0	10	0	1202.63	CON__P48668;CON__P04259;CON__P13647;G3WQ04	CON__P48668	195	204	no	no	2	1.6557e-20	193.3
YEELQVTAGR	AESWYQTKYEELQVTA	ELQVTAGRHGDDLRNT	K	Y	E	G	R	H	1	1	0	0	0	1	2	1	0	0	1	0	0	0	0	0	1	0	1	1	0	10	0	1164.58	CON__P48668;CON__P04259;CON__O95678	CON__P48668	360	369	no	no	2	0.0015709	110.08
MELQEMQLK	RAMKDEEKMELQEMQL	ELQEMQLKEAKHIAED	K	M	E	L	K	E	0	0	0	0	0	2	2	0	0	0	2	1	2	0	0	0	0	0	0	0	0	9	0	1148.56	CON__Q3SX28;G3WNR3	CON__Q3SX28	141	149	yes	no	2	0.013065	68.657		1
QLLEGEESR	DVEIATYRQLLEGEES	LLEGEESRMSGALQSQ	R	Q	L	S	R	M	0	1	0	0	0	1	3	1	0	0	2	0	0	0	0	1	0	0	0	0	0	9	0	1059.52	CON__Q6IFZ6;CON__Q7Z794	CON__Q6IFZ6	471	479	yes	no	2	0.0014386	112.3			1				1
IQLVEEELDR	DVAALNRRIQLVEEEL	LVEEELDRAQERLATA	R	I	Q	D	R	A	0	1	0	1	0	1	3	0	0	1	2	0	0	0	0	0	0	0	0	1	0	10	0	1242.65	G3VU66;G3VU65;G3WHT0;G3WX56;CON__Q3SX28;G3WNR3	G3VU66	53	62	no	no	2	0.0076016	90.614		1
LVILEGELER	KYEEVARKLVILEGEL	ILEGELERAEERAEVS	K	L	V	E	R	A	0	1	0	0	0	0	3	1	0	1	3	0	0	0	0	0	0	0	0	1	0	10	0	1169.67	G3VU66;G3VU65;CON__Q3SX28;G3WNR3	G3VU66	130	139	no	no	2	0.00079791	131.82		1
FPGQLNADLR	SGVTTCLRFPGQLNAD	GQLNADLRKLAVNMVP	R	F	P	L	R	K	1	1	1	1	0	1	0	1	0	0	2	0	0	1	1	0	0	0	0	0	0	10	0	1129.59	G3WMM3;G3W108;G3W109;G3W1X1;G3WEK2;CON__ENSEMBL:ENSBTAP00000025008;G3VYJ8;G3VXT3;G3WIQ8	G3W1X1	242	251	no	no	2	0.0014613	110.54
FPGQLNADLRK	SGVTTCLRFPGQLNAD	QLNADLRKLAVNMVPF	R	F	P	R	K	L	1	1	1	1	0	1	0	1	0	0	2	1	0	1	1	0	0	0	0	0	0	11	1	1257.68	G3WMM3;G3W108;G3W109;G3W1X1;G3WEK2;CON__ENSEMBL:ENSBTAP00000025008;G3VYJ8;G3VXT3;G3WIQ8	G3W1X1	242	252	no	no	2	0.00034031	131.42
IREEYPDR	MGTLLISKIREEYPDR	IREEYPDRIMNTFSVV	K	I	R	D	R	I	0	2	0	1	0	0	2	0	0	1	0	0	0	0	1	0	0	0	1	0	0	8	1	1076.53	G3WMM3;G3W108;G3W109;G3W1X1;G3WEK2;CON__ENSEMBL:ENSBTAP00000025008;G3VXT3;G3WIQ8	G3W1X1	155	162	no	no	2	0.00012514	131.22
KLAVNMVPFPR	GQLNADLRKLAVNMVP	VNMVPFPRLHFFMPGF	R	K	L	P	R	L	1	1	1	0	0	0	0	0	0	0	1	1	1	1	2	0	0	0	0	2	0	11	1	1270.72	G3WMM3;G3W108;G3W109;G3W1X1;G3WEK2;CON__ENSEMBL:ENSBTAP00000025008;G3VYJ8;G3VXT3	G3W1X1	252	262	no	no	2	4.7887e-15	185.61
LAVNMVPFPR	QLNADLRKLAVNMVPF	VNMVPFPRLHFFMPGF	K	L	A	P	R	L	1	1	1	0	0	0	0	0	0	0	1	0	1	1	2	0	0	0	0	2	0	10	0	1142.63	G3WMM3;G3W108;G3W109;G3W1X1;G3WEK2;CON__ENSEMBL:ENSBTAP00000025008;G3VYJ8;G3VXT3	G3W1X1	253	262	no	no	2	2.3458e-20	190.02							1
GALPAQFSHLEMLK				G	A	L	K		2	0	0	0	0	1	1	1	1	0	3	1	1	1	1	1	0	0	0	0	0	14	0	1540.81		REV__G3W4H3			yes	yes	2	0.0099906	102.97			1
[truncated: 42 more columns]

## Sheet: ProteinGroups
Protein IDs	Majority protein IDs	Peptide counts (all)	Peptide counts (razor+unique)	Peptide counts (unique)	Fasta headers	Number of proteins	Peptides	Razor + unique peptides	Unique peptides	Peptides 7750	Peptides 7751	Peptides 7752	Peptides 7753	Peptides 7754	Peptides 7755	Peptides 7756	Peptides 7757	Peptides 7758	Peptides 7759	Peptides 7760	Peptides 7761	Peptides 7762	Peptides 7763	Peptides 7764	Peptides 7765	Peptides 7766	Peptides 7767	Peptides 7768	Peptides 7769	Razor + unique peptides 7750	Razor + unique peptides 7751	Razor + unique peptides 7752	Razor + unique peptides 7753	Razor + unique peptides 7754	Razor + unique peptides 7755	Razor + unique peptides 7756	Razor + unique peptides 7757	Razor + unique peptides 7758	Razor + unique peptides 7759	Razor + unique peptides 7760	Razor + unique peptides 7761	Razor + unique peptides 7762	Razor + unique peptides 7763	Razor + unique peptides 7764	Razor + unique peptides 7765	Razor + unique peptides 7766	Razor + unique peptides 7767	Razor + unique peptides 7768	Razor + unique peptides 7769
G3VNV7;G3VJ04;G3VIW9;G3VT75;G3VIL4;G3VFZ7;G3VA09;G3VME3	G3VNV7;G3VJ04;G3VIW9;G3VT75;G3VIL4;G3VFZ7;G3VA09;G3VME3	3;3;3;3;3;3;3;2	3;3;3;3;3;3;3;2	3;3;3;3;3;3;3;2	>tr|G3VNV7|G3VNV7_SARHA Histone H2B OS=Sarcophilus harrisii GN=LOC100928127 PE=3 SV=1;>tr|G3VJ04|G3VJ04_SARHA Histone H2B OS=Sarcophilus harrisii GN=LOC100913692 PE=3 SV=1;>tr|G3VIW9|G3VIW9_SARHA Histone H2B OS=Sarcophilus harrisii GN=LOC100913958 PE=3 SV=	8	3	3	3	0	0	0	3	0	3	0	2	0	2	0	0	0	0	0	0	0	0	0	0	0	0	0	3	0	3	0	2	0	2	0	0	0	0	0	0	0	0	0	0
G3VBS9	G3VBS9	1	1	1	>tr|G3VBS9|G3VBS9_SARHA Uncharacterized protein OS=Sarcophilus harrisii GN=MYDGF PE=4 SV=1	1	1	1	1	0	0	0	0	0	1	0	0	0	0	0	0	0	0	0	0	0	0	0	0	0	0	0	0	0	1	0	0	0	0	0	0	0	0	0	0	0	0	0	0
G3VCC3	G3VCC3	1	1	1	>tr|G3VCC3|G3VCC3_SARHA Uncharacterized protein (Fragment) OS=Sarcophilus harrisii GN=LOC100918712 PE=4 SV=1	1	1	1	1	0	0	1	0	0	0	0	0	0	0	0	0	0	0	0	0	0	0	0	0	0	0	1	0	0	0	0	0	0	0	0	0	0	0	0	0	0	0	0	0
G3VCM9	G3VCM9	3	3	3	>tr|G3VCM9|G3VCM9_SARHA Uncharacterized protein OS=Sarcophilus harrisii GN=PRDX5 PE=4 SV=1	1	3	3	3	0	0	0	0	0	0	0	0	0	3	0	0	0	0	0	0	0	0	0	0	0	0	0	0	0	0	0	0	0	3	0	0	0	0	0	0	0	0	0	0
G3VYB0;G3VR81;G3WJ58;G3VD89	G3VYB0;G3VR81;G3WJ58;G3VD89	1;1;1;1	1;1;1;1	1;1;1;1	>tr|G3VYB0|G3VYB0_SARHA Uncharacterized protein OS=Sarcophilus harrisii GN=UBA52 PE=4 SV=1;>tr|G3VR81|G3VR81_SARHA Uncharacterized protein OS=Sarcophilus harrisii GN=RPS27A PE=4 SV=1;>tr|G3WJ58|G3WJ58_SARHA Uncharacterized protein OS=Sarcophilus harrisii P	4	1	1	1	1	0	0	0	0	0	0	0	0	0	0	0	0	0	0	1	0	0	1	0	1	0	0	0	0	0	0	0	0	0	0	0	0	0	0	1	0	0	1	0
G3VE53	G3VE53	3	2	2	>tr|G3VE53|G3VE53_SARHA Uncharacterized protein OS=Sarcophilus harrisii GN=YWHAH PE=3 SV=1	1	3	2	2	0	1	0	0	0	0	0	0	0	0	0	1	0	3	0	0	0	0	0	0	0	0	0	0	0	0	0	0	0	0	0	0	0	2	0	0	0	0	0	0
G3VF62	G3VF62	1	1	1	>tr|G3VF62|G3VF62_SARHA Uncharacterized protein (Fragment) OS=Sarcophilus harrisii GN=GLO1 PE=4 SV=1	1	1	1	1	0	0	0	0	0	0	0	0	0	0	0	0	0	0	0	0	0	0	0	1	0	0	0	0	0	0	0	0	0	0	0	0	0	0	0	0	0	0	0	1
G3VFN9	G3VFN9	1	1	1	>tr|G3VFN9|G3VFN9_SARHA Uncharacterized protein (Fragment) OS=Sarcophilus harrisii PE=4 SV=1	1	1	1	1	0	0	0	0	0	0	0	0	0	0	0	0	0	0	0	0	1	0	0	0	0	0	0	0	0	0	0	0	0	0	0	0	0	0	0	0	1	0	0	0
G3VGI4;G3VGI5	G3VGI4;G3VGI5	11;10	11;10	11;10	>tr|G3VGI4|G3VGI4_SARHA Uncharacterized protein OS=Sarcophilus harrisii GN=PLIN3 PE=4 SV=1;>tr|G3VGI5|G3VGI5_SARHA Perilipin OS=Sarcophilus harrisii GN=PLIN3 PE=3 SV=1	2	11	11	11	0	0	0	0	0	0	0	0	0	0	11	0	0	0	0	0	0	0	0	0	0	0	0	0	0	0	0	0	0	0	11	0	0	0	0	0	0	0	0	0
G3VIJ8	G3VIJ8	20	20	20	>tr|G3VIJ8|G3VIJ8_SARHA ATP synthase subunit beta OS=Sarcophilus harrisii GN=ATP5B PE=3 SV=1	1	20	20	20	0	0	2	0	0	0	18	0	0	0	20	0	0	0	0	0	0	0	0	0	0	0	2	0	0	0	18	0	0	0	20	0	0	0	0	0	0	0	0	0
G3VIW3;G3VIW2	G3VIW3;G3VIW2	1;1	1;1	1;1	>tr|G3VIW3|G3VIW3_SARHA Uncharacterized protein OS=Sarcophilus harrisii GN=TXLNG PE=4 SV=1;>tr|G3VIW2|G3VIW2_SARHA Uncharacterized protein OS=Sarcophilus harrisii GN=TXLNG PE=4 SV=1	2	1	1	1	1	0	0	0	0	0	0	0	0	0	0	0	0	0	0	0	0	0	0	0	1	0	0	0	0	0	0	0	0	0	0	0	0	0	0	0	0	0	0	0
G3VNJ4	G3VNJ4	2	2	2	>tr|G3VNJ4|G3VNJ4_SARHA Uncharacterized protein OS=Sarcophilus harrisii GN=TMX1 PE=4 SV=1	1	2	2	2	0	0	0	0	0	0	0	0	0	0	0	0	0	0	0	0	0	2	0	0	0	0	0	0	0	0	0	0	0	0	0	0	0	0	0	0	0	2	0	0
G3VNM4	G3VNM4	3	3	3	>tr|G3VNM4|G3VNM4_SARHA Superoxide dismutase [Cu-Zn] OS=Sarcophilus harrisii GN=SOD1 PE=3 SV=1	1	3	3	3	0	0	0	0	0	0	0	0	0	3	0	0	0	0	0	0	0	0	0	0	0	0	0	0	0	0	0	0	0	3	0	0	0	0	0	0	0	0	0	0
G3VPL9;G3VQI3;G3VVI1	G3VPL9	12;5;3	2;0;0	0;0;0	>tr|G3VPL9|G3VPL9_SARHA Uncharacterized protein OS=Sarcophilus harrisii GN=TUBA1C PE=3 SV=1	3	12	2	0	0	0	3	0	0	0	12	2	0	0	3	0	0	0	0	0	0	0	0	0	0	0	0	0	0	0	2	0	0	0	0	0	0	0	0	0	0	0	0	0
G3VS43	G3VS43	7	5	5	>tr|G3VS43|G3VS43_SARHA Uncharacterized protein OS=Sarcophilus harrisii GN=YWHAQ PE=3 SV=1	1	7	5	5	0	1	0	0	0	0	0	0	0	0	0	1	0	7	0	0	0	0	0	0	0	0	0	0	0	0	0	0	0	0	0	0	0	5	0	0	0	0	0	0
G3VU66;G3VU65;G3WHT0;G3WX56	G3VU66;G3VU65;G3WHT0	4;3;2;1	4;3;2;1	2;1;1;0	>tr|G3VU66|G3VU66_SARHA Uncharacterized protein (Fragment) OS=Sarcophilus harrisii GN=TPM4 PE=3 SV=1;>tr|G3VU65|G3VU65_SARHA Uncharacterized protein OS=Sarcophilus harrisii GN=TPM4 PE=3 SV=1;>tr|G3WHT0|G3WHT0_SARHA Uncharacterized protein OS=Sarcophilus ha	4	4	4	2	0	4	0	0	0	0	0	0	0	0	0	0	0	0	0	0	0	0	0	0	0	4	0	0	0	0	0	0	0	0	0	0	0	0	0	0	0	0	0	0
G3VVY5;G3X0Z3;G3VYK5	G3VVY5	4;1;1	4;1;1	4;1;1	>tr|G3VVY5|G3VVY5_SARHA Uncharacterized protein (Fragment) OS=Sarcophilus harrisii GN=STMN1 PE=4 SV=1	3	4	4	4	0	0	0	0	0	0	0	4	0	0	0	0	0	0	0	0	0	0	0	0	0	0	0	0	0	0	0	4	0	0	0	0	0	0	0	0	0	0	0	0
G3VX55	G3VX55	2	2	2	>tr|G3VX55|G3VX55_SARHA Thioredoxin OS=Sarcophilus harrisii GN=LOC100928003 PE=3 SV=1	1	2	2	2	0	0	0	0	0	0	0	0	0	0	0	0	2	0	0	0	0	0	0	0	0	0	0	0	0	0	0	0	0	0	0	0	2	0	0	0	0	0	0	0
G3VXP4	G3VXP4	3	3	3	>tr|G3VXP4|G3VXP4_SARHA 40S ribosomal protein SA OS=Sarcophilus harrisii GN=RPSA PE=3 SV=1	1	3	3	3	0	0	0	0	0	0	0	0	0	0	0	0	0	0	0	0	3	0	0	0	0	0	0	0	0	0	0	0	0	0	0	0	0	0	0	0	3	0	0	0
G3VXT3	G3VXT3	15	6	5	>tr|G3VXT3|G3VXT3_SARHA Uncharacterized protein OS=Sarcophilus harrisii GN=TUBB6 PE=4 SV=1	1	15	6	5	0	0	0	0	0	0	5	0	0	0	15	1	0	0	0	0	0	0	0	0	0	0	0	0	0	0	0	0	0	0	6	0	0	0	0	0	0	0	0	0
G3VYJ8	G3VYJ8	11	1	1	>tr|G3VYJ8|G3VYJ8_SARHA Uncharacterized protein (Fragment) OS=Sarcophilus harrisii GN=TUBB3 PE=3 SV=1	1	11	1	1	0	0	0	0	0	0	7	0	0	0	11	1	0	0	0	0	0	0	0	0	0	0	0	0	0	0	0	0	0	0	1	0	0	0	0	0	0	0	0	0
G3W108;G3W109	G3W108;G3W109	16;16	5;5	4;4	>tr|G3W108|G3W108_SARHA Uncharacterized protein OS=Sarcophilus harrisii GN=TUBB PE=3 SV=1;>tr|G3W109|G3W109_SARHA Uncharacterized protein OS=Sarcophilus harrisii GN=TUBB PE=3 SV=1	2	16	5	4	0	0	0	0	0	0	10	0	0	0	16	2	0	0	0	0	0	0	0	0	0	0	0	0	0	0	4	0	0	0	5	2	0	0	0	0	0	0	0	0
G3W1D6	G3W1D6	4	1	1	>tr|G3W1D6|G3W1D6_SARHA Uncharacterized protein OS=Sarcophilus harrisii GN=HSP90AA1 PE=3 SV=1	1	4	1	1	0	0	0	0	0	0	0	0	1	0	1	0	0	0	0	0	0	0	4	0	0	0	0	0	0	0	0	0	0	0	0	0	0	0	0	0	0	0	1	0
G3W1X1;G3WEK2	G3W1X1;G3WEK2	17;15	17;15	4;3	>tr|G3W1X1|G3W1X1_SARHA Uncharacterized protein OS=Sarcophilus harrisii GN=TUBB4B PE=3 SV=1;>tr|G3WEK2|G3WEK2_SARHA Uncharacterized protein OS=Sarcophilus harrisii GN=TUBB4A PE=3 SV=1	2	17	17	4	0	0	0	0	0	0	8	0	0	0	17	0	0	0	0	0	0	0	0	0	0	0	0	0	0	0	8	0	0	0	17	0	0	0	0	0	0	0	0	0
G3W4S6	G3W4S6	1	1	1	>tr|G3W4S6|G3W4S6_SARHA Uncharacterized protein OS=Sarcophilus harrisii PE=4 SV=1	1	1	1	1	0	0	1	0	0	0	0	0	0	0	0	0	0	0	0	0	0	0	0	0	0	0	1	0	0	0	0	0	0	0	0	0	0	0	0	0	0	0	0	0
G3W4X5	G3W4X5	2	2	2	>tr|G3W4X5|G3W4X5_SARHA Uncharacterized protein (Fragment) OS=Sarcophilus harrisii GN=SERPINE2 PE=3 SV=1	1	2	2	2	0	0	0	1	0	0	0	0	0	0	0	0	0	1	0	0	0	0	0	0	0	0	0	1	0	0	0	0	0	0	0	0	0	1	0	0	0	0	0	0
G3W535	G3W535	1	1	1	>tr|G3W535|G3W535_SARHA Uncharacterized protein OS=Sarcophilus harrisii GN=GMEB1 PE=4 SV=1	1	1	1	1	1	0	0	0	0	0	0	0	0	0	0	0	0	0	0	0	0	0	0	0	1	0	0	0	0	0	0	0	0	0	0	0	0	0	0	0	0	0	0	0
G3W5Z0;G3VGU0	G3W5Z0	4;1	4;1	4;1	>tr|G3W5Z0|G3W5Z0_SARHA Uncharacterized protein OS=Sarcophilus harrisii GN=CTSB PE=3 SV=1	2	4	4	4	0	0	0	0	0	0	0	0	0	0	0	0	0	0	0	0	0	4	0	0	0	0	0	0	0	0	0	0	0	0	0	0	0	0	0	0	0	4	0	0
G3W607	G3W607	1	1	1	>tr|G3W607|G3W607_SARHA Uncharacterized protein (Fragment) OS=Sarcophilus harrisii GN=DDX1 PE=4 SV=1	1	1	1	1	0	0	0	0	0	0	0	0	0	0	0	0	0	0	0	0	0	0	1	0	0	0	0	0	0	0	0	0	0	0	0	0	0	0	0	0	0	0	1	0
G3W6R1	G3W6R1	1	1	1	>tr|G3W6R1|G3W6R1_SARHA Uncharacterized protein OS=Sarcophilus harrisii GN=MTTP PE=4 SV=1	1	1	1	1	1	0	0	0	0	0	0	0	0	0	0	0	0	0	0	0	0	0	0	0	1	0	0	0	0	0	0	0	0	0	0	0	0	0	0	0	0	0	0	0
G3W6S0;G3W6S1	G3W6S0;G3W6S1	2;1	2;1	2;1	>tr|G3W6S0|G3W6S0_SARHA Uncharacterized protein OS=Sarcophilus harrisii GN=NUDT5 PE=3 SV=1;>tr|G3W6S1|G3W6S1_SARHA Uncharacterized protein OS=Sarcophilus harrisii GN=NUDT5 PE=3 SV=1	2	2	2	2	0	0	0	0	0	0	0	0	0	0	0	0	0	0	0	2	0	0	0	0	0	0	0	0	0	0	0	0	0	0	0	0	0	0	0	2	0	0	0	0
G3W8J9	G3W8J9	4	4	4	>tr|G3W8J9|G3W8J9_SARHA Aconitate hydratase, mitochondrial (Fragment) OS=Sarcophilus harrisii GN=ACO2 PE=3 SV=1	1	4	4	4	0	0	0	0	0	0	0	0	0	0	0	0	0	0	0	0	0	0	4	0	0	0	0	0	0	0	0	0	0	0	0	0	0	0	0	0	0	0	4	0
G3WB53	G3WB53	6	6	6	>tr|G3WB53|G3WB53_SARHA Uncharacterized protein OS=Sarcophilus harrisii GN=ARHGDIA PE=4 SV=1	1	6	6	6	0	0	0	0	0	0	0	0	0	0	0	0	0	0	0	6	0	0	0	0	0	0	0	0	0	0	0	0	0	0	0	0	0	0	0	6	0	0	0	0
G3WBV2	G3WBV2	8	8	8	>tr|G3WBV2|G3WBV2_SARHA Protein disulfide-isomerase OS=Sarcophilus harrisii GN=P4HB PE=3 SV=1	1	8	8	8	0	0	0	0	8	0	0	0	0	0	0	0	0	0	0	0	0	0	0	0	0	0	0	0	8	0	0	0	0	0	0	0	0	0	0	0	0	0	0	0
G3WCA6;G3WCA5	G3WCA6;G3WCA5	1;1	1;1	1;1	>tr|G3WCA6|G3WCA6_SARHA Uncharacterized protein (Fragment) OS=Sarcophilus harrisii GN=SUMF1 PE=4 SV=1;>tr|G3WCA5|G3WCA5_SARHA Uncharacterized protein (Fragment) OS=Sarcophilus harrisii GN=SUMF1 PE=4 SV=1	2	1	1	1	0	0	1	0	0	0	0	0	0	0	0	0	0	0	0	0	0	0	0	0	0	0	1	0	0	0	0	0	0	0	0	0	0	0	0	0	0	0	0	0
G3WCJ6	G3WCJ6	8	6	6	>tr|G3WCJ6|G3WCJ6_SARHA Uncharacterized protein OS=Sarcophilus harrisii GN=YWHAB PE=3 SV=1	1	8	6	6	0	1	0	0	0	0	0	0	0	0	0	1	0	8	0	0	0	0	0	0	0	0	0	0	0	0	0	0	0	0	0	0	0	6	0	0	0	0	0	0
G3WDN4;G3WDN3	G3WDN4;G3WDN3	1;1	1;1	1;1	>tr|G3WDN4|G3WDN4_SARHA Uncharacterized protein OS=Sarcophilus harrisii GN=RNF20 PE=4 SV=1;>tr|G3WDN3|G3WDN3_SARHA Uncharacterized protein OS=Sarcophilus harrisii GN=RNF20 PE=4 SV=1	2	1	1	1	1	0	0	0	0	0	0	0	0	0	0	0	0	0	0	0	0	0	0	0	1	0	0	0	0	0	0	0	0	0	0	0	0	0	0	0	0	0	0	0
G3WDY3	G3WDY3	5	5	5	>tr|G3WDY3|G3WDY3_SARHA Proliferating cell nuclear antigen OS=Sarcophilus harrisii GN=PCNA PE=3 SV=1	1	5	5	5	0	5	0	0	0	0	0	0	0	0	0	0	0	0	0	0	0	0	0	0	0	5	0	0	0	0	0	0	0	0	0	0	0	0	0	0	0	0	0	0
G3WEP5	G3WEP5	1	1	1	>tr|G3WEP5|G3WEP5_SARHA Uncharacterized protein OS=Sarcophilus harrisii GN=PREX1 PE=4 SV=1	1	1	1	1	0	0	0	0	0	0	1	0	0	0	0	0	0	0	0	0	0	0	0	0	0	0	0	0	0	0	1	0	0	0	0	0	0	0	0	0	0	0	0	0
G3WFG9	G3WFG9	1	1	1	>tr|G3WFG9|G3WFG9_SARHA Uncharacterized protein (Fragment) OS=Sarcophilus harrisii GN=SLC26A6 PE=3 SV=1	1	1	1	1	0	0	1	0	0	0	0	0	0	0	1	0	0	0	0	0	1	0	0	0	0	0	1	0	0	0	0	0	0	0	1	0	0	0	0	0	1	0	0	0
G3WG64;G3WU71	G3WG64;G3WU71	1;1	1;1	1;1	>tr|G3WG64|G3WG64_SARHA Uncharacterized protein OS=Sarcophilus harrisii GN=LOC100915871 PE=4 SV=1;>tr|G3WU71|G3WU71_SARHA Uncharacterized protein (Fragment) OS=Sarcophilus harrisii GN=SFPQ PE=4 SV=1	2	1	1	1	0	0	0	0	0	0	0	0	0	0	0	0	0	0	0	0	0	0	1	0	0	0	0	0	0	0	0	0	0	0	0	0	0	0	0	0	0	0	1	0
G3WHB8	G3WHB8	5	2	2	>tr|G3WHB8|G3WHB8_SARHA Uncharacterized protein OS=Sarcophilus harrisii GN=DES PE=3 SV=1	1	5	2	2	0	0	5	0	0	0	5	0	5	0	5	0	0	0	0	0	5	0	0	0	0	0	2	0	0	0	2	0	2	0	2	0	0	0	0	0	2	0	0	0
G3WHE0	G3WHE0	11	11	9	>tr|G3WHE0|G3WHE0_SARHA Uncharacterized protein OS=Sarcophilus harrisii GN=YWHAZ PE=3 SV=1	1	11	11	9	0	1	0	0	0	0	0	0	0	0	0	1	0	11	0	3	0	0	0	0	0	1	0	0	0	0	0	0	0	0	0	1	0	11	0	3	0	0	0	0
G3WIG4;G3WIG3	G3WIG4;G3WIG3	1;1	1;1	1;1	>tr|G3WIG4|G3WIG4_SARHA Uncharacterized protein (Fragment) OS=Sarcophilus harrisii GN=IFT57 PE=4 SV=1;>tr|G3WIG3|G3WIG3_SARHA Uncharacterized protein (Fragment) OS=Sarcophilus harrisii GN=IFT57 PE=4 SV=1	2	1	1	1	1	0	0	0	0	0	0	0	0	0	0	0	0	0	0	0	0	0	0	0	1	0	0	0	0	0	0	0	0	0	0	0	0	0	0	0	0	0	0	0
G3WIQ8	G3WIQ8	4	1	1	>tr|G3WIQ8|G3WIQ8_SARHA Uncharacterized protein OS=Sarcophilus harrisii GN=TUBB1 PE=3 SV=1	1	4	1	1	0	0	0	0	0	0	0	0	0	0	4	0	0	0	0	0	0	0	0	0	0	0	0	0	0	0	0	0	0	0	1	0	0	0	0	0	0	0	0	0
G3WJK7;G3WFK2	G3WJK7;G3WFK2	14;10	14;10	1;0	>tr|G3WJK7|G3WJK7_SARHA Uncharacterized protein OS=Sarcophilus harrisii GN=LOC100932522 PE=3 SV=1;>tr|G3WFK2|G3WFK2_SARHA Uncharacterized protein OS=Sarcophilus harrisii GN=TUBA8 PE=3 SV=1	2	14	14	1	0	0	4	0	0	0	14	3	0	0	4	0	0	0	0	0	0	0	0	0	0	0	4	0	0	0	14	3	0	0	4	0	0	0	0	0	0	0	0	0
G3WJU5	G3WJU5	12	1	1	>tr|G3WJU5|G3WJU5_SARHA Uncharacterized protein OS=Sarcophilus harrisii GN=TUBA4A PE=3 SV=1	1	12	1	1	0	0	1	0	0	0	12	1	0	0	1	0	0	0	0	0	0	0	0	0	0	0	0	0	0	0	1	0	0	0	0	0	0	0	0	0	0	0	0	0
G3WK87	G3WK87	1	1	1	>tr|G3WK87|G3WK87_SARHA Lon protease homolog (Fragment) OS=Sarcophilus harrisii GN=LONP1 PE=3 SV=1	1	1	1	1	0	0	0	0	0	0	1	0	0	0	0	0	0	0	0	0	0	0	0	0	0	0	0	0	0	0	1	0	0	0	0	0	0	0	0	0	0	0	0	0
G3WL00;G3WL01	G3WL00;G3WL01	2;2	2;2	2;2	>tr|G3WL00|G3WL00_SARHA Uncharacterized protein OS=Sarcophilus harrisii GN=LMNA PE=3 SV=1;>tr|G3WL01|G3WL01_SARHA Uncharacterized protein OS=Sarcophilus harrisii GN=LMNA PE=3 SV=1	2	2	2	2	0	0	0	0	0	0	0	0	0	2	0	0	0	0	0	0	0	0	0	0	0	0	0	0	0	0	0	0	0	2	0	0	0	0	0	0	0	0	0	0
G3WMM3;G3WM01	G3WMM3	15;4	2;0	2;0	>tr|G3WMM3|G3WMM3_SARHA Uncharacterized protein OS=Sarcophilus harrisii GN=TUBB2A PE=3 SV=1	2	15	2	2	0	0	0	0	0	0	6	0	0	0	15	1	0	0	0	0	0	0	0	0	0	0	0	0	0	0	0	0	0	0	2	0	0	0	0	0	0	0	0	0
G3WP04	G3WP04	8	7	7	>tr|G3WP04|G3WP04_SARHA Uncharacterized protein OS=Sarcophilus harrisii GN=YWHAE PE=3 SV=1	1	8	7	7	0	3	0	0	0	0	0	0	0	0	0	8	0	1	0	0	0	0	0	0	0	2	0	0	0	0	0	0	0	0	0	7	0	0	0	0	0	0	0	0
G3WPL8;G3VSD9;G3WL72;G3W3D6;CON__Q9DCV7;CON__Q3KNV1;CON__P08729;CON__P05787;CON__Q9H552;G3VJ06;G3X1X5;G3VX42;CON__Q9NSB2;CON__Q6ISB0;G3VF04	G3WPL8	25;5;3;2;2;2;2;2;2;2;1;1;1;1;1	25;5;3;2;2;2;2;2;2;2;1;1;1;1;1	22;3;0;0;0;0;0;0;0;0;0;0;0;0;0	>tr|G3WPL8|G3WPL8_SARHA Uncharacterized protein (Fragment) OS=Sarcophilus harrisii GN=VIM PE=3 SV=1	15	25	25	22	4	0	23	1	1	0	20	0	22	1	18	1	0	1	0	0	24	2	0	0	4	0	23	1	1	0	20	0	22	1	18	1	0	1	0	0	24	2	0	0
G3WR44	G3WR44	1	1	1	>tr|G3WR44|G3WR44_SARHA Uncharacterized protein (Fragment) OS=Sarcophilus harrisii GN=SUDS3 PE=4 SV=1	1	1	1	1	0	0	0	1	0	0	0	0	0	0	0	0	0	0	0	0	0	0	0	0	0	0	0	1	0	0	0	0	0	0	0	0	0	0	0	0	0	0	0	0
G3WRR2	G3WRR2	6	6	6	>tr|G3WRR2|G3WRR2_SARHA Uncharacterized protein (Fragment) OS=Sarcophilus harrisii GN=UBA5 PE=4 SV=1	1	6	6	6	0	0	0	0	0	0	0	0	0	0	6	0	0	0	0	0	0	0	0	0	0	0	0	0	0	0	0	0	0	0	6	0	0	0	0	0	0	0	0	0
G3WSM9	G3WSM9	11	2	2	>tr|G3WSM9|G3WSM9_SARHA Uncharacterized protein OS=Sarcophilus harrisii GN=LOC100920562 PE=3 SV=1	1	11	2	2	0	0	3	0	0	0	11	2	0	0	3	0	0	0	0	0	0	0	0	0	0	0	1	0	0	0	2	1	0	0	1	0	0	0	0	0	0	0	0	0
G3WV76	G3WV76	2	2	2	>tr|G3WV76|G3WV76_SARHA Ubiquitin carboxyl-terminal hydrolase (Fragment) OS=Sarcophilus harrisii GN=UCHL1 PE=3 SV=1	1	2	2	2	0	0	0	0	0	0	0	0	0	0	0	0	0	0	0	0	0	0	0	2	0	0	0	0	0	0	0	0	0	0	0	0	0	0	0	0	0	0	0	2
G3WX93	G3WX93	1	1	1	>tr|G3WX93|G3WX93_SARHA Uncharacterized protein (Fragment) OS=Sarcophilus harrisii GN=PKD1L3 PE=4 SV=1	1	1	1	1	0	0	0	0	0	1	0	0	0	0	0	0	0	0	0	0	0	0	0	0	0	0	0	0	0	1	0	0	0	0	0	0	0	0	0	0	0	0	0	0
G3WXK9;G3W7E7	G3WXK9	3;1	3;1	3;1	>tr|G3WXK9|G3WXK9_SARHA Uncharacterized protein (Fragment) OS=Sarcophilus harrisii GN=APPL1 PE=4 SV=1	2	3	3	3	0	0	0	0	0	0	0	0	0	0	0	0	0	0	0	0	0	0	3	0	0	0	0	0	0	0	0	0	0	0	0	0	0	0	0	0	0	0	3	0
G3WXL4;G3WXL3;G3VIT4	G3WXL4;G3WXL3	5;5;2	5;5;2	5;5;2	>tr|G3WXL4|G3WXL4_SARHA Uncharacterized protein OS=Sarcophilus harrisii GN=HNRNPK PE=4 SV=1;>tr|G3WXL3|G3WXL3_SARHA Uncharacterized protein OS=Sarcophilus harrisii GN=HNRNPK PE=4 SV=1	3	5	5	5	4	0	1	0	0	0	0	0	0	0	0	0	0	0	0	0	0	0	0	0	4	0	1	0	0	0	0	0	0	0	0	0	0	0	0	0	0	0	0	0
G3WYP8;G3WYP7	G3WYP8;G3WYP7	4;4	4;4	1;1	>tr|G3WYP8|G3WYP8_SARHA Uncharacterized protein OS=Sarcophilus harrisii GN=HSP90AB1 PE=3 SV=1;>tr|G3WYP7|G3WYP7_SARHA Uncharacterized protein OS=Sarcophilus harrisii GN=HSP90AB1 PE=3 SV=1	2	4	4	1	0	0	0	0	0	0	0	0	1	0	1	0	0	0	0	0	0	0	4	0	0	0	0	0	0	0	0	0	1	0	1	0	0	0	0	0	0	0	4	0
G3WZD1	G3WZD1	7	7	7	>tr|G3WZD1|G3WZD1_SARHA Uncharacterized protein (Fragment) OS=Sarcophilus harrisii GN=CRABP1 PE=4 SV=1	1	7	7	7	0	0	0	0	0	0	0	0	0	0	0	0	3	0	7	0	0	0	0	0	0	0	0	0	0	0	0	0	0	0	0	0	3	0	7	0	0	0	0	0
G3WZS7	G3WZS7	11	11	11	>tr|G3WZS7|G3WZS7_SARHA Uncharacterized protein OS=Sarcophilus harrisii GN=HSPD1 PE=3 SV=1	1	11	11	11	11	0	0	0	0	0	0	0	0	0	0	0	0	0	0	0	0	0	0	0	11	0	0	0	0	0	0	0	0	0	0	0	0	0	0	0	0	0	0	0
G3X0B8;CON__Q3SX14	G3X0B8	11;1	11;1	11;1	>tr|G3X0B8|G3X0B8_SARHA Uncharacterized protein OS=Sarcophilus harrisii GN=GSN PE=4 SV=1	2	11	11	11	0	0	0	0	0	0	0	0	0	0	0	0	0	0	0	0	0	0	11	0	0	0	0	0	0	0	0	0	0	0	0	0	0	0	0	0	0	0	11	0
CON__ENSEMBL:ENSBTAP00000025008	CON__ENSEMBL:ENSBTAP00000025008	7	2	2	>ENSEMBL:ENSBTAP00000025008 (Bos taurus) hypothetical protein	1	7	2	2	0	0	0	0	0	0	2	0	0	0	7	0	0	0	0	0	0	0	0	0	0	0	0	0	0	0	1	0	0	0	2	0	0	0	0	0	0	0	0	0
CON__P00761	CON__P00761	4	4	4	>P00761 SWISS-PROT:P00761|TRYP_PIG Trypsin - Sus scrofa (Pig).	1	4	4	4	1	3	3	1	2	2	3	2	2	2	3	2	2	1	2	2	2	2	2	2	1	3	3	1	2	2	3	2	2	2	3	2	2	1	2	2	2	2	2	2
CON__P02533;CON__Q6IFX2	CON__P02533;CON__Q6IFX2	6;3	2;1	1;1	>P02533 SWISS-PROT:P02533 Tax_Id=9606 Gene_Symbol=KRT14 Keratin, type I cytoskeletal 14;>Q6IFX2 SWISS-PROT:Q6IFX2 Tax_Id=10090 Gene_Symbol=Krt42 Keratin, type I cytoskeletal 42	2	6	2	1	0	0	0	0	0	0	0	1	0	0	5	0	0	0	0	0	0	3	0	0	0	0	0	0	0	0	0	0	0	0	2	0	0	0	0	0	0	1	0	0
CON__P02768-1	CON__P02768-1	9	9	7	>P02768-1 SWISS-PROT:P02768-1 Tax_Id=9606 Gene_Symbol=ALB Isoform 1 of Serum albumin precursor	1	9	9	7	1	2	3	4	7	3	5	5	6	4	7	6	5	7	3	2	3	3	3	5	1	2	3	4	7	3	5	5	6	4	7	6	5	7	3	2	3	3	3	5
CON__P02769	CON__P02769	4	2	2	>P02769 SWISS-PROT:P02769 (Bos taurus) Bovine serum albumin precursor	1	4	2	2	1	1	2	2	4	2	1	2	1	2	1	3	2	3	2	1	1	2	1	1	1	0	1	0	2	1	0	1	0	1	0	1	1	2	1	0	0	0	0	0
CON__P48668;CON__P04259;CON__O95678;CON__P13647;G3WQ04;CON__Q8VED5	CON__P48668;CON__P04259	11;11;5;5;4;2	8;8;3;3;3;1	1;1;0;0;0;0	>P48668 SWISS-PROT:P48668 Tax_Id=9606 Gene_Symbol=KRT6C Keratin, type II cytoskeletal 6C;>P04259 SWISS-PROT:P04259 Tax_Id=9606 Gene_Symbol=KRT6B Keratin, type II cytoskeletal 6B	6	11	8	1	0	1	0	1	0	1	1	1	1	1	10	1	0	1	0	0	1	2	2	1	0	0	0	0	0	0	0	0	0	0	8	0	0	0	0	0	0	0	1	0
CON__P04264	CON__P04264	15	15	9	>P04264 SWISS-PROT:P04264 Tax_Id=9606 Gene_Symbol=KRT1 Keratin, type II cytoskeletal 1	1	15	15	9	0	3	0	1	2	4	5	5	0	4	14	5	0	3	4	0	3	13	4	4	0	3	0	1	2	4	5	5	0	4	14	5	0	3	4	0	3	13	4	4
CON__P08779;CON__Q9Z2K1;CON__Q3ZAW8;G3VZP3;CON__P19012;CON__A2A4G1;G3VYT0;CON__P08727;G3VKB3;CON__P19001;CON__ENSEMBL:ENSP00000377550;G3VN74;G3VXC8;CON__P13646-1;G3VZV1	CON__P08779	9;3;3;3;2;2;2;1;1;1;1;1;1;1;1	8;2;2;2;2;1;1;1;1;1;1;1;1;1;1	5;1;1;0;0;0;0;0;0;0;0;0;0;0;0	>P08779 SWISS-PROT:P08779 Tax_Id=9606 Gene_Symbol=KRT16 Keratin, type I cytoskeletal 16	15	9	8	5	0	0	0	0	0	0	0	1	0	0	8	0	0	0	0	0	0	2	0	0	0	0	0	0	0	0	0	0	0	0	7	0	0	0	0	0	0	1	0	0
CON__P13645;CON__P02535-1;G3VGH6;G3W3P8;G3W481;CON__Q7Z3Z0;CON__Q7Z3Y8;G3W3C8;CON__Q148H6;G3W3P7;G3W2T7;CON__Q7Z3Y7;G3W2T6;G3W1R6;G3W1R7;G3VLK2;CON__Q7Z3Y9;G3VDX7	CON__P13645	16;4;2;2;2;2;2;2;2;2;2;2;2;2;2;1;1;1	16;4;2;2;2;2;2;2;2;2;2;2;2;2;2;1;1;1	15;3;1;1;1;1;1;1;1;1;1;1;1;2;2;0;0;0	>P13645 SWISS-PROT:P13645 Tax_Id=9606 Gene_Symbol=KRT10 Keratin, type I cytoskeletal 10	18	16	16	15	0	1	0	1	0	0	4	8	0	1	13	2	0	2	1	0	4	7	2	1	0	1	0	1	0	0	4	8	0	1	13	2	0	2	1	0	4	7	2	1
CON__P34955	CON__P34955	2	2	2	>P34955 SWISS-PROT:P34955 (Bos taurus) Alpha-1-antiproteinase precursor	1	2	2	2	0	0	0	0	0	0	2	0	0	0	1	0	0	0	0	0	0	0	0	0	0	0	0	0	0	0	2	0	0	0	1	0	0	0	0	0	0	0	0	0
CON__P35527	CON__P35527	13	13	13	>P35527 SWISS-PROT:P35527 Tax_Id=9606 Gene_Symbol=KRT9 Keratin, type I cytoskeletal 9	1	13	13	13	0	0	1	0	0	0	3	1	0	0	8	0	0	1	0	0	0	5	0	0	0	0	1	0	0	0	3	1	0	0	8	0	0	1	0	0	0	5	0	0
CON__P35908;G3VF31;CON__Q5XKE5;G3VF30;CON__REFSEQ:XP_932229;G3VQB4;CON__P07744;CON__P19013;CON__P12035;CON__Q01546;CON__Q3TTY5	CON__P35908	13;2;2;2;1;1;1;1;1;1;1	11;0;2;0;1;1;1;1;1;1;1	8;0;0;0;0;0;0;0;0;0;1	>P35908 SWISS-PROT:P35908 Tax_Id=9606 Gene_Symbol=KRT2 Keratin, type II cytoskeletal 2 epidermal	11	13	11	8	0	2	0	1	1	2	2	9	1	2	8	2	0	2	1	0	3	5	2	2	0	1	0	1	0	1	1	8	1	1	6	1	0	1	0	0	2	3	1	1
CON__Q3SX28;G3WNR3	CON__Q3SX28;G3WNR3	3;3	1;1	1;1	>Q3SX28 TREMBL:Q3SX28;Q5KR48 (Bos taurus) Tropomyosin 2;>tr|G3WNR3|G3WNR3_SARHA Uncharacterized protein OS=Sarcophilus harrisii GN=TPM2 PE=3 SV=1	2	3	1	1	0	3	0	0	0	0	0	0	0	0	0	0	0	0	0	0	0	0	0	0	0	1	0	0	0	0	0	0	0	0	0	0	0	0	0	0	0	0	0	0
CON__Q6IFZ6;CON__Q7Z794;CON__Q9R0H5;CON__Q6NXH9	CON__Q6IFZ6;CON__Q7Z794;CON__Q9R0H5;CON__Q6NXH9	2;2;1;1	1;1;0;0	1;1;0;0	>Q6IFZ6 SWISS-PROT:Q6IFZ6 Tax_Id=10090 Gene_Symbol=Krt77 Keratin, type II cytoskeletal 1b;>Q7Z794 SWISS-PROT:Q7Z794 Tax_Id=9606 Gene_Symbol=KRT77 Keratin 77;>Q9R0H5 SWISS-PROT:Q9R0H5 Tax_Id=10090 Gene_Symbol=Krt71 Keratin, type II cytoskeletal 6G;>Q6NXH9 T	4	2	1	1	0	1	1	0	1	1	2	1	1	1	2	1	0	1	1	0	2	1	1	1	0	0	1	0	0	0	1	0	1	0	1	0	0	0	0	0	1	0	0	0
REV__G3W4H3	REV__G3W4H3	1	1	1	>tr|G3W4H3|G3W4H3_SARHA Uncharacterized protein OS=Sarcophilus harrisii GN=FAM132A PE=4 SV=1	1	1	1	1	0	0	1	0	0	0	0	0	0	0	0	0	0	0	0	0	0	0	0	0	0	0	1	0	0	0	0	0	0	0	0	0	0	0	0	0	0	0	0	0
[truncated: 81 more columns]
